1     **Reciprocal requirement of Wnt signaling and**  
2     **SKN-1 underlies cryptic intraspecies variation**  
3             **in an ancient embryonic gene regulatory**  
4                     **network**

5  
6  
7  
8     Yamila N. Torres Cleuren<sup>1,2\*</sup>, Chee Kiang Ewe<sup>2</sup>, Kyle C. Chipman<sup>2</sup>, Emily Mears<sup>1</sup>, Cricket G. Wood<sup>2</sup>,  
9     Coco Al-Alami<sup>1</sup>, Melissa R. Alcorn<sup>2</sup>, Thomas L. Turner<sup>3</sup>, Pradeep M. Joshi<sup>2</sup>, Russell G. Snell<sup>1</sup>, and Joel  
10                     H. Rothman<sup>1,2,3</sup>

11  
12     1. School of Biological Sciences, University of Auckland, Auckland, New Zealand

13     2. Department of MCD Biology and Neuroscience Research Institute, University of California Santa  
14     Barbara, CA, USA

15     3. Department of Ecology, Evolution, and Marine Biology, University of California Santa Barbara, CA,  
16     USA

17     \*Current address: Computational Biology Unit, Department of Informatics, University of Bergen,  
18     Bergen, 5020 Norway

19     Author for correspondence: [joel.rothman@lifesci.ucsb.edu](mailto:joel.rothman@lifesci.ucsb.edu)

20

21     **Keywords:** SKN-1, *C. elegans*, endoderm, GWAS, development, gene regulatory networks, Genotype-  
22     By-Sequencing, cryptic variation

23

24

25 **ABSTRACT**

26

27 Innovations in metazoan development arise from evolutionary modifications of gene  
28 regulatory networks (GRNs). We report large cryptic variation in the requirement for two key  
29 inputs, SKN-1/Nrf2 and MOM-2/Wnt, into the *C. elegans* endoderm-determining GRN. Some  
30 natural variants show a nearly absolute requirement for SKN-1 and MOM-2, while in others,  
31 most of the embryos differentiate endoderm in their absence. GWAS and analysis of  
32 recombinant inbred lines reveal multiple genetic regions underlying this broad phenotypic  
33 variation. A striking reciprocal relationship is seen in which genomic variants, or debilitation  
34 of genes involved in endoderm formation, that result in high SKN-1 requirement show low  
35 MOM-2/Wnt requirement and *vice-versa*. Thus, cryptic variation in the endoderm GRN may  
36 be tuned by opposing requirements for these two key regulatory inputs. These findings reveal  
37 that while the downstream components in the endoderm GRN are common across  
38 metazoans, initiating regulatory inputs are remarkable plastic even within a single species.

39

## 40 INTRODUCTION

41 While the core regulatory machinery that specifies embryonic germ layers and major  
42 organ identity in the ancestor of modern animals has been bequeathed to all extant animals,  
43 GRN architecture must be able to accommodate substantial plasticity to allow for  
44 evolutionary innovation in developmental strategies, changes in selective pressures, and  
45 genetic drift [1,2]. Genetic variation, often with neutral effects on fitness, provides for  
46 plasticity in GRN structure and implementation [2]. Although studies of laboratory strains of  
47 model organisms with a defined genetic background have been highly informative in  
48 identifying the key regulatory nodes in GRNs that specify developmental processes [3–5],  
49 these approaches do not reveal the evolutionary basis for plasticity in these networks. Which  
50 parameters of GRN architecture provide the greatest opportunity for genetically driven  
51 evolutionary change, and which are more rigidly fixed? The variation and incipient changes in  
52 GRN function and architecture can be discovered by analyzing phenotypic differences  
53 resulting from natural genetic variation present in distinct isolates of a single species [6–8].

54 The endoderm has been proposed to be the most ancient of the three embryonic  
55 germ layers in metazoans [9,10], having appeared prior to the advent of the bilateria about  
56 600 Mya [11]. It follows, therefore, that the GRN for endoderm in extant animals has  
57 undergone substantial modifications over the long evolutionary time span since its  
58 emergence. However, the core transcriptional machinery for endoderm specification and  
59 differentiation appears to share common mechanisms across metazoan phylogeny. For  
60 example, cascades of GATA-type transcription factors function to promote endoderm  
61 development not only in triploblastic animals but in the most ancient creatures that possess  
62 endoderm [12–16]. Among the many observations supporting a common regulatory

63 mechanism for establishing the endoderm, it has been found that the endoderm-determining  
64 GATA factor, END-1, in the nematode *C. elegans*, is sufficient to activate endoderm  
65 development in cells that would otherwise become ectoderm in *Xenopus* [17]. This indicates  
66 that the role of GATA factors in endoderm development has been preserved since the  
67 nematodes and vertebrates diverged from a common ancestor that lived perhaps 600 Mya.

68 To assess the genetic basis for evolutionary plasticity and cryptic variation underlying  
69 early embryonic germ layer specification, we have analyzed the well-described GRN for  
70 endoderm specification in *C. elegans*. The E cell, which is produced in the very early *C. elegans*  
71 embryo, is the progenitor of the entire endoderm, which subsequently gives rise exclusively  
72 to the intestine. The EMS blastomere at the four-cell stage divides to produce the E founder  
73 cell and its anterior sister, the MS founder cell, which is the progenitor for much of the  
74 mesoderm [18]. Both E and MS fates are determined by maternally provided SKN-1, an  
75 orthologue of the vertebrate Nrf2 bZIP transcription factor [19–21]. In the laboratory N2  
76 strain, elimination of maternal SKN-1 function (through either knock down or knockout)  
77 results in fully penetrant embryonic lethality as a result of misspecification of EMS cell  
78 descendants. In these embryos, the fate of MS is transformed to that of its cousin, the  
79 mesectodermal progenitor C cell. E cells similarly adopt a C cell-like fate in a majority, but not  
80 all, of these embryos [19]. SKN-1 initiates mesendoderm development via the GRN in E and  
81 MS cells in part by activating zygotic expression of the MED-1/2 divergent GATA transcription  
82 factors [22,23]. This event mobilizes a cascade of GATA factors in the E cell lineage that  
83 ultimately direct intestinal differentiation [21,24,25].

84 This differential requirement for SKN-1 in endoderm (E) and mesoderm (MS)  
85 development is determined by its combinatorial action with triply redundant Wnt, MAPK, and

86 Src signaling systems, which act together to polarize EMS [26–29]. MOM-2/Wnt acts through  
87 the MOM-5/Frizzled receptor, mobilizing WRM-1/ $\beta$ -catenin, resulting in its cytoplasmic  
88 accumulation in the posterior side of EMS. WRM-1, together with LIT-1/NLK kinase, alters  
89 both the nucleocytoplasmic distribution and activity of the Wnt effector POP-1/Tcf [29–31],  
90 converting it from a repressor of endoderm in the MS cell lineage to an activator in the E cell  
91 lineage [32–37]. Loss of MOM-2 expression in the laboratory N2 strain results in a partial  
92 gutless phenotype, while removal of both MOM-2 and SKN-1, through either knockdown or  
93 knockout, leads to a completely penetrant loss of gut [29], revealing their genetically  
94 redundant roles.

95         The regulatory relationship between SKN-1 and POP-1, the effector of Wnt signaling,  
96 shows striking variation even in relatively closely related species, suggesting substantial  
97 evolutionary plasticity in this key node in the endoderm GRN. *C. elegans* embryos lacking  
98 maternal POP-1 always make gut, both in the normal E cell lineage and in the MS cell lineage.  
99 However, in embryos lacking both SKN-1 and POP-1, endoderm is virtually never made,  
100 implying that these two factors constitute a Boolean “OR” logic gate. In contrast, removal of  
101 either SKN-1 or POP-1 alone in *C. briggsae* causes >90% of embryos to lack gut, indicative of  
102 an “AND” logic gate (Fig. 1A, B) [38].

103         In this study, we sought to determine whether the aforementioned changes in  
104 regulatory logic of the two major inputs into endoderm development are evident within the  
105 radiation of a single species. The availability of many naturally inbred variants (isotypes) of *C.*  
106 *elegans* that show widespread genomic variation [39–41], provides a genetically rich resource  
107 for investigating potential quantitative variation in developmental GRNs. We report here that  
108 the requirement for activation of the endoderm GRN by SKN-1 or MOM-2, but not POP-1, is

109 profoundly variable between natural *C. elegans* isolates, and even between very closely  
110 related isotypes. Thus, the key regulatory inputs into this major embryonic decision is subject  
111 to exceedingly rapid evolutionary modification. Genome-wide association studies in isolates  
112 from the natural populations and targeted analysis of recombinant inbred lines (RILs),  
113 revealed that a multiplicity of loci and their interactions are responsible for the variation in  
114 the developmental requirement for SKN-1 and MOM-2. We identified a striking reciprocal  
115 requirement for SKN-1 and MOM-2: loci associated with a high requirement for SKN-1 show  
116 a lower requirement for MOM-2 and *vice-versa*. We further identified several other  
117 endoderm regulatory factors, including RICT-1, PLP-1, and MIG-5, that show similar reciprocal  
118 relationships between these two GRN inputs. These findings reveal that the activation of the  
119 GRN network in specifying a germ layer, one of the most critical and early developmental  
120 switches in embryos, is subject to remarkable genetic plasticity during the radiation of a  
121 species and that the dynamic and rapid change in network architecture reflects influences  
122 distributed across many genetic components that affect both SKN-1 and Wnt pathways.

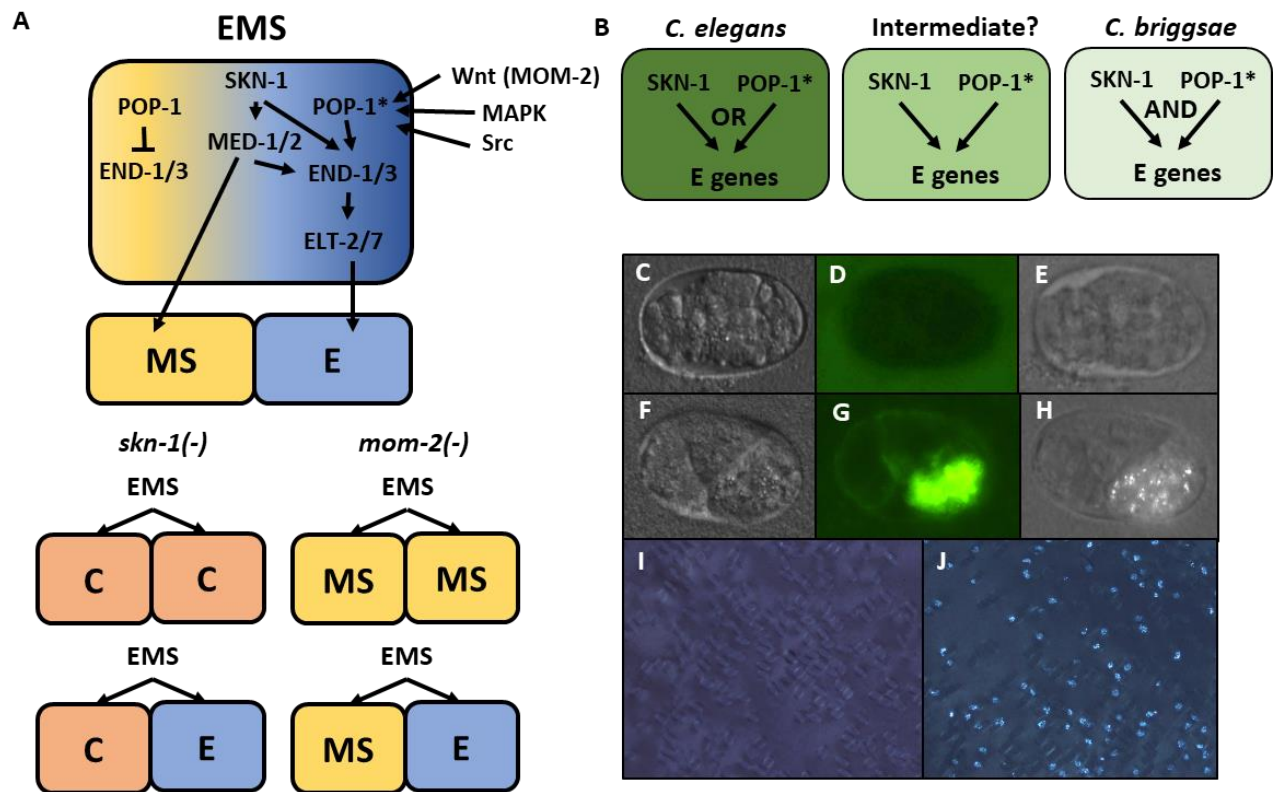

123  
124

125 **Fig 1. Endoderm regulatory pathway and scoring of gut differentiation.**

126 A) Under normal conditions, signaling from the posterior P<sub>2</sub> cell (Wnt, MAPK and Src) results in asymmetric  
 127 cortical localization of Wnt signaling pathway components in EMS leading to POP-1 asymmetry in the  
 128 descendants of EMS, with high levels of nuclear POP-1 in anterior MS and low levels of nuclear POP-1 in  
 129 the posterior, E, daughter cell. In the anterior MS cell, high nuclear POP-1 represses the END genes,  
 130 allowing SKN-1 to activate MS fate. In the posterior E cell, which remains in contact with P<sub>2</sub>, POP-1 is  
 131 converted to an activator and, along with SKN-1, activates the END genes, resulting in endoderm fate. Loss  
 132 of *skn-1*, either by RNAi or in loss-of-function mutants, causes 100% of the embryos to arrest; in 70% of the  
 133 arrested embryos, EMS gives rise to two C-like cells, while in the remaining 30% only MS is converted to a  
 134 C fate; the posterior daughter retains its E fate. Loss of *mom-2* leads to embryonic arrest with a partially  
 135 penetrant E→MS cell fate transformation, resulting in MS-like daughter cells. (B) Regulatory logic of SKN-1  
 136 and POP-1 in E specification in *C. elegans*, *C. briggsae* and a hypothetical intermediate state. POP-1\*  
 137 denotes the activated state. (C-H) Gut visualization in embryos affected by *skn-1* RNAi. (C-E) arrested  
 138 embryos without endoderm, (F-H) arrested embryos with endoderm. (C, F) DIC images of arrested embryos  
 139 ~12 hours after egg laying. (D, G) the same embryos expressing the gut-specific *elt-2::GFP* reporter, and  
 140 (E, H) birefringent gut granules under polarized light. All embryos showing gut birefringence also show  
 141 *elt-2::GFP* expression. (I, J) Fields of arrested *skn-1(RNAi)* embryos in wild isolate strains JU1491 (I)  
 142 and JU440 (J), which reflect the extremes in the spectrum of requirement of SKN-1 in gut development at 0.9% and  
 143 60%, respectively.

144 **MATERIALS AND METHODS**

145

146 ***C. elegans* strains and maintenance**

147 All wild isolates, each with a unique haplotype [40], were obtained from the Caenorhabditis  
148 Genetics Center (CGC) (see Supplemental file 1). Worm strains were maintained as described  
149 [42] and all experiments were performed at 20°C unless noted otherwise. The following  
150 mutant and transgenic strains were used in this study: JJ185 *dpy-13(e184) skn-1(zu67) IV*;  
151 *mDp1 (IV;f)* , JR3666 (*elt-2::GFP*) *X*; (*ifb-2::GFP*) *IV*, EU384 *dpy-11(e1180) mom-2(or42) V/nT1*  
152 [*let-?(m435)*] (*IV;V*), JJ1057 *pop-1(zu189) dpy-5(e61)/hT1 I*; *him-5(e1490)/hT1 V*, KQ1366 (*rict-*  
153 *1(ft7) II*, SU351 *mig-5(rh94)/mIn1 [dpy-10(e128) mIs14] II*, and RB1711 *plp-1(ok2155) IV*.

154 **RNAi**

155 Feeding-based RNAi experiments were performed as described [43]. RNAi clones were  
156 obtained from either the Vidal [44] or Ahringer libraries [45]. RNAi bacterial strains were  
157 grown at 37°C in LB containing 50 µg/ml ampicillin. The overnight culture was then diluted  
158 1:10. After 4 hours of incubation at 37°C, 1 mM of IPTG was added and 60µl was seeded onto  
159 35mm agar plates containing 1 mM IPTG and 25 µg/ml carbenicillin. Seeded plates were  
160 allowed to dry and used within five days. Five to 10 L4 animals were placed on RNAi plate. 24  
161 hours later, they were transferred to another RNAi plate and allowed to lay eggs for four or  
162 12 hours (12 hours for *skn-1* RNAi and four hours for the other RNAi). The adults were then  
163 removed, leaving the embryos to develop for an extra 7-9 hours. Embryos were quantified  
164 and imaged on agar pad using Nikon Ti-E inverted microscope.

165

166 **Antibody staining**



167 The embryonic gut cells and nuclei of all cells were stained with MH33 (mouse anti-IFB-2,  
168 deposited to the DSHB by Waterston, R.H.) and AHP418 (rabbit anti-acetylated histone H4,  
169 Serotec Bio-Rad) respectively. Fixation and permeabilization were carried out as described  
170 previously [46]. Goat anti-mouse Alexa Fluor® 594 and goat anti-rabbit Alexa Fluor® 488  
171 secondary antibodies were used at 1:1000 dilution.

## 172 **Quantification of endoderm specification**

173 Gut was scored by presence of birefringent gut granule in arrested embryos [47,48]. For *skn-*  
174 *1(RNAi)*, the laboratory strain N2, which shows invariable ~30% of embryos with endoderm,  
175 was used as a control for all experiments.

## 176 **Introgression of *skn-1(zu67)*, *pop-1(zu189)*, and *mom-2(or42)* alleles into wild isolate** 177 **backgrounds**

178 To introgress *skn-1(zu67)* into wild isolates (WI), males from the wild isolate strains were  
179 crossed to JJ186 *dpy-13(e184) skn-1(zu67) IV; mDp1 (IV;f)* hermaphrodites. mDp1 is a free  
180 duplication that rescues the Dpy and lethal phenotypes of *dpy-13(e184)* and *skn-1(zu67)*  
181 respectively. Animals that have lost the free duplication will be Dpy and produce dead  
182 offspring. Wild type F1 hermaphrodites that have lost the free duplication as determined by  
183 presence of a ¼ Dpy progeny in the F2 were selected. 10 single non-Dpy F2 hermaphrodite  
184 descendants from F1 animals heterozygous for *skn-1(zu67)* (2/3 of which would be of the  
185 genotype *WI dpy-13(+) skn-1(+)/ dpy-13(e184) skn-1(zu67)* were backcrossed to their  
186 respective parental wild strain. 10 F3 hermaphrodites were picked to individual plates. Half  
187 of the F3 cross progeny would be heterozygous for *dpy-13(e184) skn-1(zu67)*, as evidenced  
188 by presence of F4 Dpy progeny that produced dead embryos. Non-Dpy siblings were used to  
189 continue the introgression as described. This was repeated for at least 5 rounds of

190 introgression. The embryonic gutless phenotype in the progeny of the Dpy animals was  
191 quantified.

192 Similarly, to introgress *pop-1(zu189)* or *mom-2(or42)* alleles into wild isolates, JJ1057  
193 *pop-1(zu189) dpy-5(e61)/hT1 I*; *him-5(e1490)/hT1V* or EU384 *dpy-11(e1180) mom-2(or42)*  
194 *V/nT1 [let-?(m435)] (IV;V)* were used, respectively. The mutant strain was crossed to the wild  
195 isolates. Non-Dpy F2 animals heterozygous for the chromosomal mutation were selected and  
196 backcrossed to their respective parental wild strain for at least four rounds of introgression  
197 for *pop-1* and seven rounds for *mom-2*. The embryonic gutless phenotype in the progeny of  
198 the Dpy animals was quantified, as above.

#### 199 **Statistical Analyses: GWAS and EMMA**

200 All data were analyzed and plotted using R software v 3.2.3 ([https://www.r-](https://www.r-project.org/)  
201 [project.org/](https://www.r-project.org/)). GWAS for both phenotypes was performed using *C. elegans* wild isolates and  
202 a previously published SNP map containing 4,690 SNPs [40] with the EMMA R package. P-  
203 values were calculated using mixed model analysis [49] (`emma.REML.t()` function) and IBS  
204 kinship matrix to account for population structure. For *skn-1* and *mom-2* RNAi phenotypic  
205 data, a genome-wide permutation-based FDR was also calculated for the EMMA results from  
206 10,000 permuted values [50,51]. In addition, a linear model GWAS was performed with the  
207 same SNP map (but no kinship matrix) on both *mom-2* and *skn-1* datasets, with FDR  
208 calculations obtained from 10,000 permuted values. However, owing to the skewed nature  
209 of the *mom-2(RNAi)* data (Supplemental Fig. 4), genome-wide permutation-based FDR  
210 thresholds did not reveal any significant loci. The p-values for each individual SNP were then  
211 adjusted based on 1000 permutations at each locus. Significance thresholds were set at  
212  $p < 0.01$  and  $0.001$ .

## 213 **Correlation Analysis**

214 In order to test for the relationship between *mom-2 (RNAi)* and *skn-1 (RNAi)* phenotypic data,  
215 the difference between median phenotypic values for each SNP were calculated  
216 independently on both a genome-wide level (N = 4690) and at the SNPs most significantly  
217 associated with the *mom-2 (RNAi)* phenotype (N = 45,  $p < 0.01$ ). Pearson's correlation test  
218 was used to calculate correlation between median phenotypic values for genome-wide  
219 analysis using a sliding window (N = 50 SNPs). Spearman's Rho was used to calculate the  
220 correlation using only SNPs most significantly associated with *mom-2* GWAS.

## 221 **RIL construction and Genotype-By-Sequencing (GBS)**

222 Recombinant inbred lines (RILs) were created by crossing an N2 hermaphrodite and an MY16  
223 male. 120 F2 progeny were cloned to individual plates and allowed to self-fertilize for 10  
224 generations. A single worm was isolated from each generation to create inbred lines. A total  
225 of 95 lines were successfully created and frozen stocks were immediately created and kept at  
226  $-80^{\circ}\text{C}$  (Supplemental File 2), prior to DNA sequencing.

227 DNA was extracted using Blood and Tissue QIAGEN kit from worms from each of the RILs  
228 grown on four large NGM plates (90x15mm) with OP50 *E. coli* until starved (no more than a  
229 day). Samples were submitted in 96-well plate format at  $10 \text{ ng}/\mu\text{l} < n < 30 \text{ ng}/\mu\text{l}$ . GBS libraries  
230 were constructed using digest products from ApeKI (GWCGC), using a protocol modified from  
231 [52]. After digestion, the barcoded adapters were ligated and fragments  $< 100\text{bp}$  were  
232 sequenced as single-end reads using an Illumina HiSeq 2000 lane (100 bp, single-end reads).

233 SNP calling was performed using the GBSversion3 pipeline in Trait Analysis by aSSociation,  
234 Evolution and Linkage (TASSEL) [53]. Briefly, fastq files were aligned to reference genome

235 WS252 using BWA v. 0.7.8-r455 and SNPs were filtered using vcftools [54]. Samples with  
236 greater than 90% missing data and SNPs with minor allele frequencies (MAF) of <1% were  
237 excluded from analysis, identifying 27,396 variants.

### 238 **QTL mapping using R/qtl**

239 Variants identified by GBS pipeline were filtered to match the SNPs present in the parental  
240 MY16 strain (using vcftools `-recode` command), and variants were converted to a 012 file  
241 (vcftools `-012` command). Single-QTL analysis was performed in R/QTL [55] using 1770  
242 variants and 95 RILs. Significant QTL were determined using Standard Interval Mapping  
243 (`scanone()` “em”) and genome-wide significance thresholds were calculated by permuting the  
244 phenotype (N =1,000). Change in log-likelihood ratio score of 1.5 was used to calculate 95%  
245 confidence intervals and define QTL regions [56].

246 **RESULTS**

247 **Extensive natural cryptic variation in the requirement for SKN-1 in endoderm specification**  
248 **within the *C. elegans* species**

249         The relationship between SKN-1 and Wnt signaling through POP-1 in the endoderm  
250 GRN has undergone substantial divergence in the *Caenorhabditis* genus [38]. While neither  
251 input alone is absolutely required for endoderm specification in *C. elegans*, each is essential  
252 in *C. briggsae*, which has been estimated to have diverged from *C. elegans* ~20-40 Mya  
253 [57,58]. In contrast to the *C. elegans* N2 laboratory strain, removal of either SKN-1 or POP-1  
254 alone results in fully penetrant conversion of the E founder cell fate into that of the  
255 mesectodermal C blastomere and of E to MS fate, respectively, in *C. briggsae* [38]. These  
256 findings revealed that the earliest inputs into the endoderm GRN are subject to substantial  
257 evolutionary differences between these two species (Fig. 1B). We sought to determine  
258 whether incipient evolutionary plasticity in this critical node at the earliest stages of  
259 endoderm development might be evident even within a single species of the *Caenorhabditis*  
260 genus by assessing their requirement in *C. elegans* wild isolates and testing whether the  
261 quantitative requirements of each input were correlated.

262         Elimination of detectable maternal SKN-1 from the laboratory N2 strain by either a  
263 strong (early nonsense) chromosomal mutation (*skn-1(zu67)*), or by RNAi knockdown, results  
264 in a partially penetrant phenotype: while the E cell adopts the fate of the C cell in the majority  
265 of embryos, and gut is not made, ~30% of arrested embryos undergo strong gut  
266 differentiation, as evidenced by the appearance of birefringent, gut-specific rhabditin  
267 granules, or expression of *elt-2::GFP*, a marker of the developing and differentiated intestine  
268 (Fig. 1C-H). We found that RNAi of *skn-1* in different N2-derived mutant strains gave highly

269 reproducible results: 100% of the embryos derived from *skn-1(RNAi)*-treated mothers arrest  
270 ( $n > 100,000$ ) and  $32.0 \pm 1.9\%$  of the arrested embryos exhibited birefringent gut granules (Fig.  
271 2A; Supplemental Fig. 1). We found that the LSJ1 laboratory strain, which is derived from the  
272 same original source as N2, but experienced very different selective pressures in the  
273 laboratory owing to its constant propagation in liquid culture over 40 years [59], gave virtually  
274 identical results to that of N2 ( $31.0\% \pm \text{s.d. } 1.2\%$ ), implying that SKN-1-independent endoderm  
275 formation is a quantitatively stable trait. The low variability in this assay, and high number of  
276 embryos that can be readily examined ( $\geq 500$  embryos per experiment), provides a sensitive  
277 and highly reliable system with which to analyze genetic variation in the endoderm GRN  
278 between independent *C. elegans* isolates.

279 To assess variation in SKN-1 requirement within the *C. elegans* species, we analyzed  
280 the outcome of knocking down SKN-1 by RNAi in 96 unique *C. elegans* wild isolates [40].  
281 Owing to their propagation by self-fertilization, each of the isolates (isotypes) is a naturally  
282 inbred clonal population that is virtually homozygous and defines a unique haplotype. The  
283 reported estimated population mutation rate averages  $8.3 \times 10^{-4}$  per bp [40], and we found  
284 that a substantial fraction (29/97) of isotypes were quantitatively indistinguishable in  
285 phenotype between the N2 and LSJ1 laboratory strains (Fig. 2A). We found that all strains,  
286 with the exception of the RNAi-resistant Hawaiian CB4856 strain, invariably gave 100%  
287 embryonic lethality *with skn-1(RNAi)*, showing that on the basis of that criterion all strains are  
288 fully sensitive to RNAi. However, we observed dramatic variation in the fraction of embryos  
289 with differentiated gut across the complete set of strains, ranging from 0.9% to 60% (Fig. 2A).  
290 Repeated measurements with  $> 500$  embryos per replicate per strain revealed very high  
291 reproducibility (Supplemental Fig. 1), indicating that even small differences in the fraction of  
292 embryos generating endoderm could be reproducibly measured. Further, we found that some

293 wild isolates that were subsequently found to have identical genome sequences also gave  
294 identical results. We note that these results contrast with those of Paaby *et al.* [60], who  
295 found that RNAi in liquid culture of a set of 55 wild isolates resulted in much weaker effects,  
296 both on lethality and on gut differentiation. This difference is likely attributable to variability  
297 in RNAi efficacy in the latter study [61,62].

298         Although birefringent and autofluorescent rhabditin granules have been used as a  
299 marker of gut specification and differentiation in many studies [47,48], it is conceivable that  
300 the variation in fraction of embryos containing this marker that we observed might reflect  
301 variations in gut granule formation rather than in gut differentiation *per se*. We note that  
302 embryos from all strains showed a decisive “all-or-none” phenotype: i.e., they were either  
303 strongly positive for gut differentiation or completely lacked gut granules, with virtually no  
304 intermediate or ambiguous phenotypes. A threshold of gene activity in the GRN has been  
305 shown to account for such an all-or-none switch in gut specification [22,63,64]. This  
306 observation is inconsistent with possible variation in gut granule production: if SKN-1-  
307 depleted embryos were defective in formation of the many granules present in each gut cell,  
308 one might expect to observe gradations in numbers or signal intensity of these granules  
309 between gut cells or across a set of embryos. Nonetheless, we extended our findings by  
310 analyzing expression of the gut-specific intermediate filament IFB-2, a marker of late gut  
311 differentiation, in selected strains representing the spectrum of phenotypes observed (Fig.  
312 2B). As with gut granules, we found that embryos showed all-or-none expression of IFB-2. In  
313 all cases, we found that the fraction of embryos containing immunoreactive IFB-2 was not  
314 significantly different (Fisher’s exact test, p-values > 0.05) from the fraction containing gut  
315 granules, strongly suggesting that the strains vary in endoderm specification *per se* and  
316 consistent with earlier studies of SKN-1 function [19,22].

317           Although we found that *skn-1(RNAi)* was 100% effective at inducing embryonic  
318 lethality in all strains (with the exception of the RNAi-defective Hawaiian strain, CB4856), it is  
319 conceivable that, at least for the strains that showed a weaker phenotype than for N2 (i.e.,  
320 higher number of embryos specifying endoderm), the variation observed between strains  
321 might be attributable to differences in RNAi efficacy rather than in the endoderm GRN. To  
322 address this possibility, we introgressed the strong loss-of-function *skn-1(zu67)* chromosomal  
323 mutation into five wild isolates whose phenotypes spanned the spectrum observed (ranging  
324 from 2% of embryos with differentiated gut for MY16 to 50% for MY1) (Fig. 2C). In all cases,  
325 we found that introgression of the allele through five rounds of backcrosses resulted in a  
326 quantitative phenotype that was similar or identical to that of the effect observed with *skn-*  
327 *1(RNAi)*. The phenotypes of the introgressed allele were significantly different (p-values  
328 <0.01) from that of the parental N2 *skn-1(zu67)* strain, except for DL238, whose *skn-1(RNAi)*  
329 phenotype was indistinguishable from that of N2. The results obtained by introgression from  
330 four of the isotypes (CX11262, DL238, EG4724 and MY1), were not statistically different  
331 (Student t-test, p-values >0.05) from the corresponding RNAi knock down results (Fig. 2C)  
332 (i.e., the phenotype was suppressed or enhanced relative to N2 in these genetic backgrounds  
333 to the same extent as with *skn-1(RNAi)*). However, while the MY16 *skn-1(zu67)* strain shifted  
334 in the predicted direction (i.e., became stronger) when compared to the N2 strain, it was a  
335 weaker effect than was evident by RNAi knockdown, even following eight rounds of  
336 introgression. Nonetheless, diminished RNAi efficacy in MY16 cannot explain the large  
337 difference in *skn-1(RNAi)* phenotype between N2 and MY16, as the latter phenotype is much  
338 stronger, not weaker, than the former. As described below, we identified a modifier locus in  
339 the MY16 strain that is closely linked to the *skn-1* gene; it seems likely that the N2  
340 chromosomal segment containing this modifier was carried with the *skn-1(zu67)* mutation



341 through the introgression crosses, thereby explaining the somewhat weaker phenotype of  
342 the introgressed allele compared to the RNAi effect in MY16. The results of introgression of  
343 the *skn-1(zu67)* chromosomal mutation confirm that the extreme variation in *skn-1(RNAi)*  
344 phenotype between the wild isolates results from *bona fide* cryptic variation in the endoderm  
345 GRN, rather than differences in RNAi efficacy.

346 We note that the strength of *skn-1(RNAi)* phenotype does not correlate with  
347 phylogenetic relatedness between the strains (Mantel test  $r = 0.21$ , NS). To illustrate, while  
348 some closely related strains (e.g., MY16 and MY23) showed a similar gut developmental  
349 phenotype, some very closely related strains (e.g., JU1491 and JU778) had phenotypes on the  
350 opposite ends of the phenotypic spectrum (Fig. 3A). We also did not observe any significant  
351 correlation between geographical distribution and *skn-1 (RNAi)* phenotype (Fig. 3B). These  
352 findings suggest that the endoderm GRN may be subject to rapid intraspecies evolutionary  
353 divergence and suggests that a small number of loci may underlie variation in the trait.

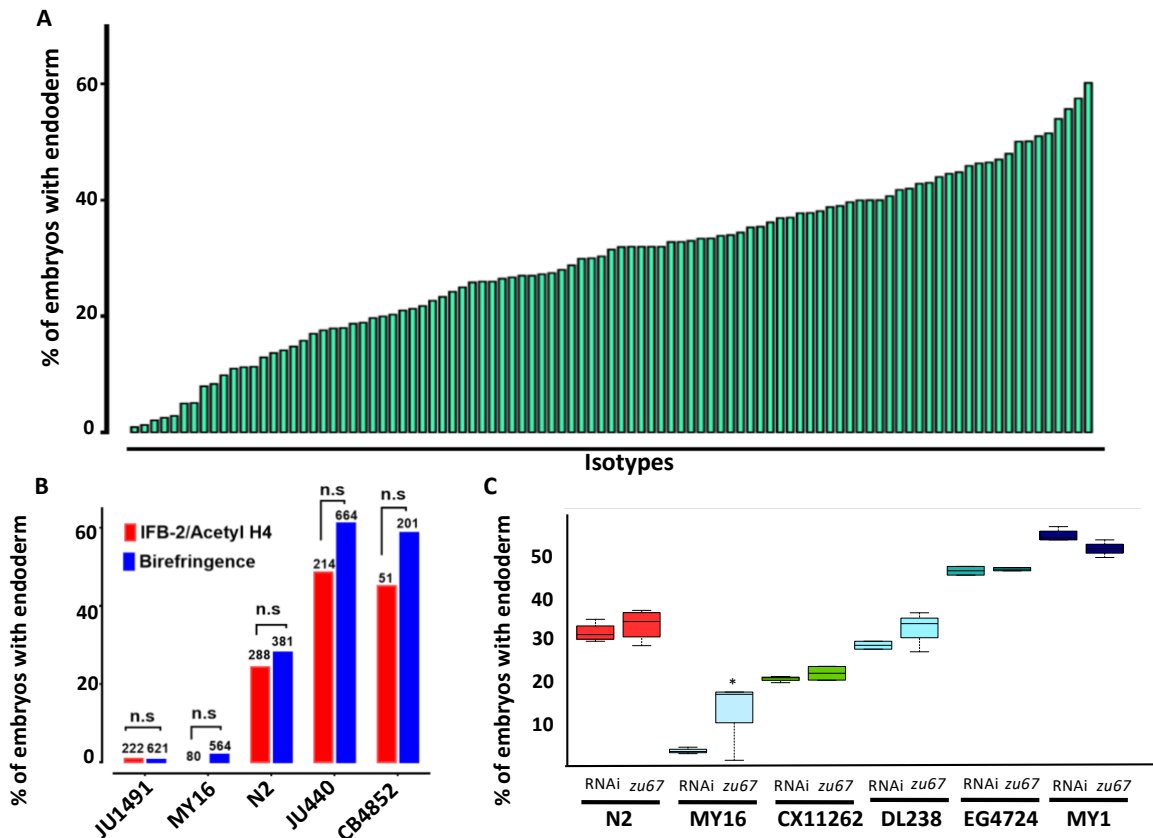

354

355 **Fig. 2: Quantitative effects of loss of *skn-1* on endoderm formation.**

356 (A) Spectrum of *skn-1*(RNAi) effects across the *C. elegans* isolates. The effects of *skn-1*(RNAi) are quantified  
 357 as the average percentage of arrested embryos with endoderm (y-axis). All wild isolates treated with *skn-1*-  
 358 *1*(RNAi) resulted in 100% embryonic arrest ( $n > 500$  embryos per replicate per isotype and at least two  
 359 replicates per isotype). (B) Comparison of *skn-1*(RNAi) phenotype using two different gut markers  
 360 (birefringent gut granules and MH33 staining of IFB-2) in five different genetic backgrounds. In all cases,  
 361 no significant statistical difference was found between the two quantitative methods. Fisher's exact test  
 362 (NS  $p$ -value  $> 0.05$ ). (C) Comparison of *skn-1*(RNAi) and *skn-1*(*zu67*) effects on endoderm development in six  
 363 different genetic backgrounds. For each color-coded strain, the first value is of the *skn-1*(RNAi) results (5  
 364 replicates), while the second is the result for the *skn-1*(*zu67*) allele introgression (10 replicates). For all  
 365 strains (with the exception of MY16), no significant statistical difference was found between the RNAi  
 366 knockdown and corresponding *skn-1*(*zu67*) allele effects on endoderm development. Student t-test (NS  $p$ -  
 367 value  $> 0.05$ , \*  $p$ -value  $< 0.05$ ).

368

369

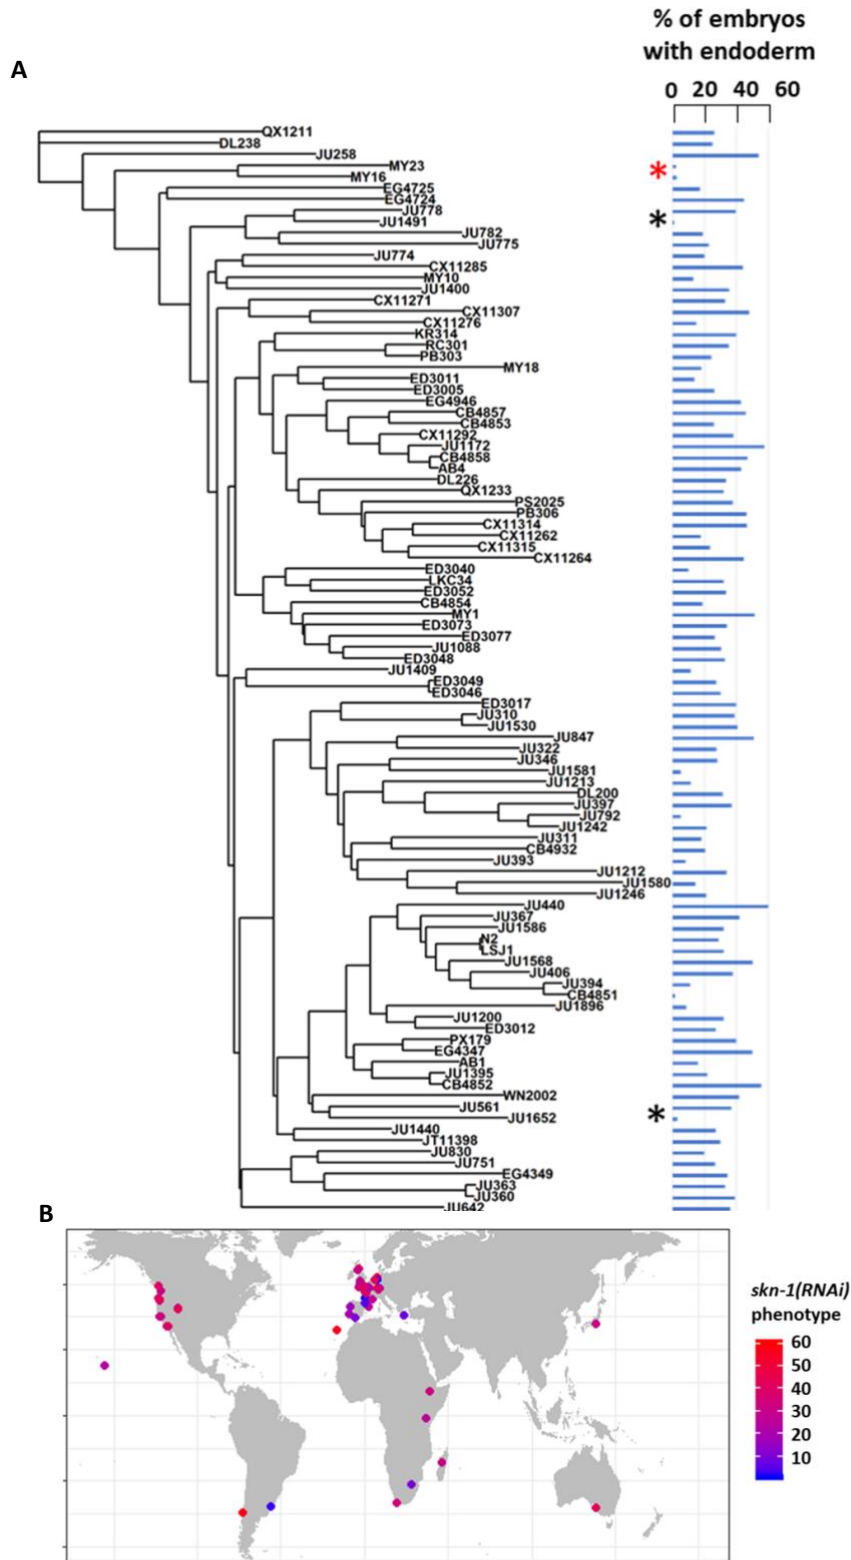

370  
371  
372  
373  
374  
375  
376  
377

**Fig. 3: SKN-1 requirement does not correlate with genotypic relatedness or geographical location.**

(A) *skn-1(RNAi)* phenotype of 97 isolates arranged with respect to the neighbor-joining tree constructed using 4,690 SNPs and pseudo-rooted to QX1211. Red asterisk indicates an example of closely related strains (MY23 and MY16) with similar phenotype, while black asterisks indicate example sister strains (JU778 and JU1491; JU561 and JU1652) with distinct phenotype. Phylogenetic relatedness and phenotype (measured as Euclidean distance) are not significantly correlated (Mantel test,  $r = 0.21$ , NS). (B) Worldwide distribution of *skn-1(RNAi)* phenotype across 97 wild isolates. Each circle represents a single isotype.

378 **Cryptic variation in the quantitative requirement for MOM-2 Wnt, but not POP-1, in**  
379 **endoderm development**

380 The switch in the relationship of the SKN-1 and Wnt inputs between *C. elegans* (“OR”  
381 operator) and *C. briggsae* (“AND” operator) [38], and the extensive variation in the  
382 requirement for SKN-1 seen across *C. elegans* isolates, raised the possibility that the  
383 quantitative requirement for Wnt components might vary between unique isolates of *C.*  
384 *elegans*. It has been shown that signaling from Ras pathway varies in different *C. elegans* wild  
385 isolates and hyperactive Wnt signaling can compensate for reduced Ras activity in the vulva  
386 signaling network [6,65]. Given that removal of the maternal Wnt input also results in a  
387 partially penetrant gut defect (through either knock-out or knockdown of Wnt signaling  
388 components), it is conceivable that a compensatory relationship may exist between the SKN-  
389 1 and Wnt inputs. We investigated this possibility by examining the requirement for the  
390 MOM-2/Wnt ligand in the same wild isolates that were tested for the SKN-1 gut  
391 developmental requirement. Indeed, we observed broad variation in the requirement for  
392 MOM-2/Wnt in activation of the endoderm GRN between isotypes. *mom-2(RNAi)* of 94  
393 isotypes resulted in embryonic arrest, indicating that, as with *skn-1(RNAi)*, *mom-2(RNAi)* was  
394 effective at least by the criterion of lethality. Two isotypes, CB4853 and EG4349, did not  
395 exhibit *mom-2(RNAi)*-induced lethality and were omitted from further analyses. In the  
396 affected strains, the fraction of *mom-2(RNAi)* embryos with differentiated gut varied from  
397 ~40% to ~99% (Fig. 4A). As with *skn-1(RNAi)*, the *mom-2(RNAi)* phenotype of isotypes N2,  
398 JU440, and JU1213 was further confirmed by immunostaining with IFB-2 (Fig 4B), again  
399 demonstrating that birefringence of gut granules is a reliable proxy for endoderm formation  
400 for this analysis.

401 To assess whether the observed variation in the *mom-2(RNAi)* phenotype reflected  
402 differences in the GRN or RNAi efficacy, the *mom-2(or42)* allele was introgressed into three  
403 different genetic backgrounds chosen from the extreme ends of the phenotypic spectrum.  
404 *mom-2(RNAi)* of the laboratory N2 strain resulted in the developmental arrest of embryos. Of  
405 those, ~90% contained differentiated endoderm, a result that was highly reproducible. In  
406 contrast, the introgression of an apparent loss-of-function allele, *mom-2(or42)*, into the N2  
407 strain results in a more extreme phenotype: only ~28% of embryos show endoderm  
408 differentiation (Fig. 4C) [29]. While this discrepancy can partly be explained by incomplete  
409 RNAi efficacy, it is notable that the penetrance of *mom-2* alleles vary widely [29]. We  
410 observed strain-specific variation in embryonic lethality response to RNAi of *mom-2* between  
411 the different isotypes. However, we found that the *mom-2(or42)* introgressed strains show  
412 qualitatively similar effects to those observed with *mom-2* RNAi. For example, the *mom-*  
413 *2(or42)* allele introgressed into the isotype JU1213 background resulted in a severe gutless  
414 phenotype ( $5.7\% \pm \text{s.d } 2.4\%$ ;  $n=2292$ ) a similar but more extreme effect than was seen with  
415 RNAi ( $34.0\% \pm \text{s.d } 1.5\%$ ;  $n=1876$ ). This is the strongest phenotype that has been reported for  
416 any known *mom-2* allele. On the other hand, introgression of the *mom-2* mutation gave rise  
417 to a significantly higher fraction of embryos with endoderm in isotypes DL226 ( $55.2\% \pm \text{s.d}$   
418  $1.2\%$ ,  $n=1377$ ) and PB303 ( $65.5\% \pm \text{s.d } 4.9\%$ ,  $n=2726$ ), relative to the laboratory strain N2  
419 ( $29.1\% \pm \text{s.d } 3.1\%$ ;  $n=1693$ ), consistent with the RNAi phenotypes (Fig. 4C). These findings  
420 indicate that the differential requirement for MOM-2 is, at least in part, attributable to  
421 genetic modifiers in these strains.

422 As the MOM-2/Wnt signal is mediated through the POP-1 transcription factor, we  
423 sought to determine whether the requirement for POP-1 might also vary between isolates.  
424 We found that, while *pop-1(RNAi)* resulted in 100% embryonic lethality across all 96 RNAi-

425 sensitive isolates, 100% of the arrested embryos contained a differentiated gut (n>500 for  
426 each isolate scored) (results not shown). Thus, all isolates behave similarly to the N2 strain  
427 with respect to the requirement for POP-1. These results were confirmed by introgressing a  
428 strong loss-of-function *pop-1(zu189)* allele into four wild isolates (N2, MY16, JU440, and  
429 KR314) (Supplemental Fig. 2). The lack of variation in endoderm specification after loss of  
430 POP-1 is not entirely unexpected. As has been observed in a *pop-1(-)* mutant strain,  
431 elimination of the endoderm-repressive role of POP-1 in the MS lineage (which is not  
432 influenced by the P2 signal) supersedes its endoderm activating role in the presence of SKN-  
433 1. Indeed, the original observation that all *pop-1(-)* embryos in an N2 background contain gut  
434 masked the activating function for POP-1, which is apparently only in the absence of SKN-1  
435 [32,34,36]. It is likely that, as with the N2 strain, gut arises from both E and MS cells in all of  
436 these strains; however, as we have scored only for presence or absence of gut, it is  
437 conceivable that the E lineage is not properly specified in some strains, a possibility that  
438 cannot be ruled out without higher resolution analysis.

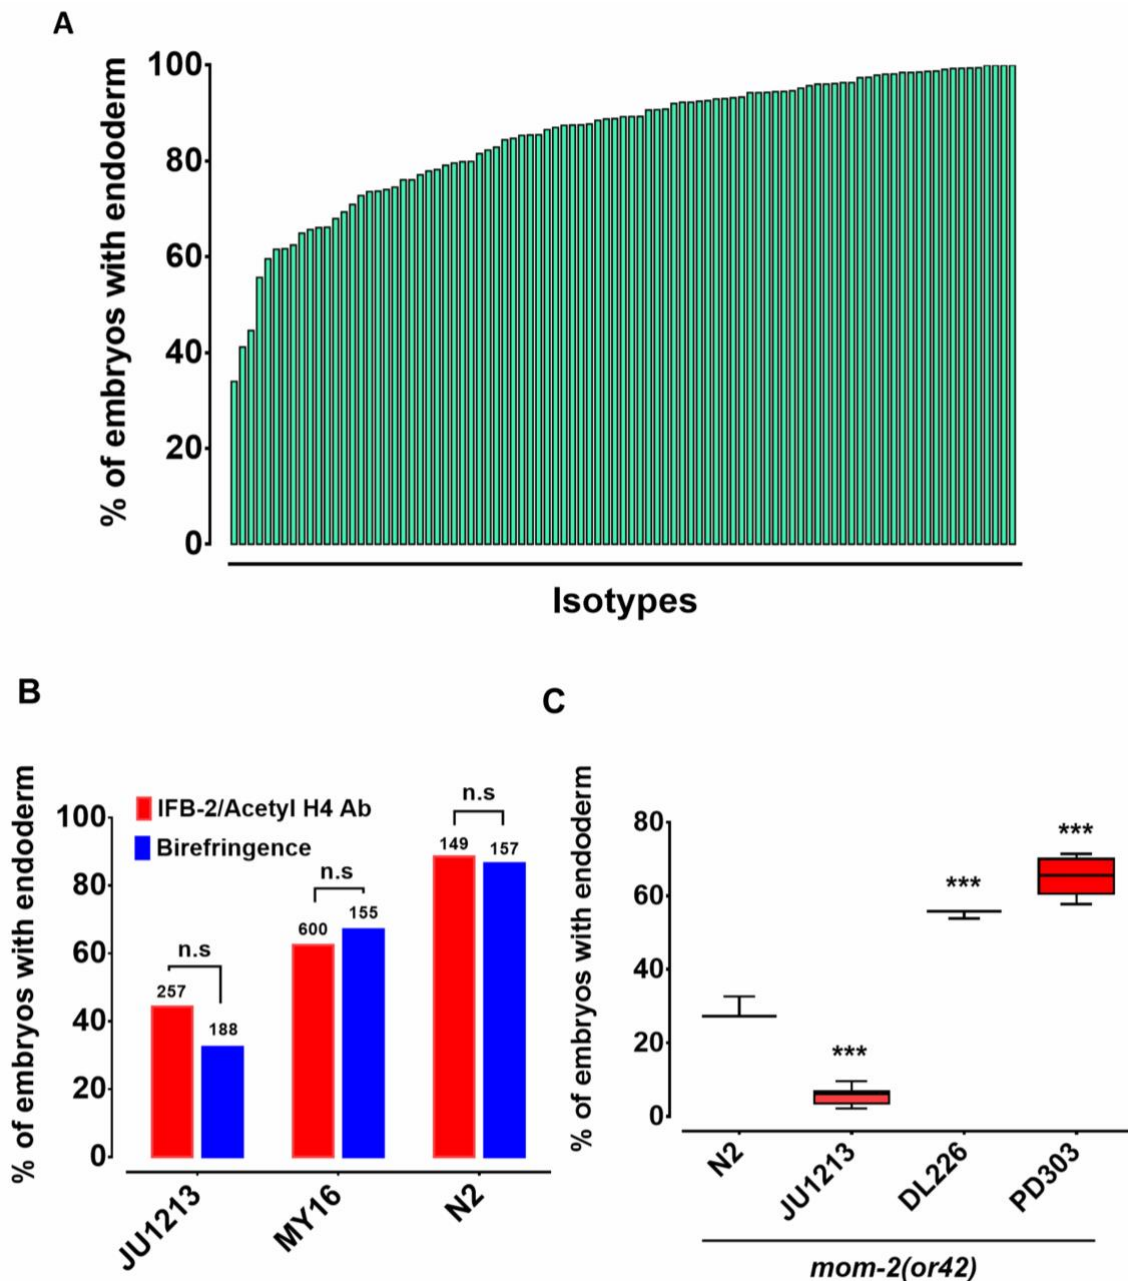

439

440 **Fig. 4: Wide variation in the *mom-2(RNAi)* phenotype.**

441 (A) Spectrum of *mom-2(RNAi)* effects across the *C. elegans* isolates. The effects of *mom-2(RNAi)* are  
 442 quantified as the average percentage of arrested embryos with endoderm (y-axis). Each column represents  
 443 the mean for each wild isolate (n >500 embryos were scored for each experiment with at least two  
 444 replicates per isotype). (B) Comparison of *mom-2(RNAi)* phenotype using two different gut markers  
 445 (birefringent gut granules and MH33 staining of IFB-2) in three different genetic backgrounds. In all cases,  
 446 no significant statistical difference was found between the two quantitative methods. Fisher's exact test  
 447 (NS p-value>0.05). (C) Comparison of the effect of *mom-2(or42)* on endoderm development after  
 448 introgression into four different genetic backgrounds. At least three independent introgressed lines were  
 449 studied for each wild isotype. The results were compared to N2; *mom-2(or42)* shown by dashed line.  
 450 Student t-test (\*\*\*) p-value<0.001).

451 **Genome-wide association studies (GWAS) and analysis of RILs identify multiple genomic**  
452 **regions underlying variation in the two major endoderm GRN inputs**

453 We sought to examine the genetic basis for the wide variation in SKN-1 and Wnt  
454 requirements across *C. elegans* isolates and to evaluate possible relationships in the variation  
455 seen with the SKN-1 and Wnt inputs by performing linear-model GWAS using the available  
456 SNP makers and map [40]. This analysis identified two highly significantly associated regions  
457 on chromosome IV and V (FDR < 1.5) that underlie the variation in SKN-1 requirement  
458 (Supplemental Fig. 3A). To ensure that these two QTLs were not an artifact of genetic  
459 relatedness between sets of strains, we applied the more stringent EMMA (Efficient Mixed-  
460 Model Analysis) algorithm, which adjusts for population structure (Fig. 5A) [49,66]. This  
461 approach also identified the same significant location on chromosome IV. The two mapping  
462 approaches show a moderate linear correlation (Spearman correlation coefficient = 0.43)  
463 (Supplemental Fig. 3B). In each case, the most statistically significant SNPs within each of the  
464 two identified QTLs are highly associated with the observed variance in SKN-1 requirement  
465 (Fig 5C; Supplemental Fig. 3C, D).

466 GWAS analysis on the *mom-2(RNAi)* phenotypic variation proved more challenging  
467 because this phenotype showed a highly skewed distribution (Shapiro-Wilk' test  $W = 0.8682$ ,  
468  $p\text{-value} = 1.207 \times 10^{-7}$ ) (Supplemental Fig. 4). Nevertheless, by applying a linear model GWAS  
469 and adjusting the individual p-values using a permutation-based approach (see Materials and  
470 Methods) and EMMA (Fig. 5B, Supplemental Fig. 5A), both GWAS and EMMA revealed highly  
471 correlated results (Pearson's  $R = 0.95$ ,  $p\text{-value} < 2.2 \times 10^{-16}$ ) (Supplemental Fig. 5B). Although  
472 GWAS identified 45 significant SNPs distributed across the genome (GWAS adjusted p-values  
473 < 0.01), EMMA did not reveal any significant genomic regions for *mom-2(RNAi)* variation,  
474 suggesting that the MOM-2 requirement is a highly complex trait influenced by many loci.



475 However, when we compared the p-values of individual SNPs from *skn-1(RNAi)* and *mom-*  
 476 *2(RNAi)* EMMA, a substantial overlap in the central region of chromosome of chromosome IV  
 477 was observed (Supplemental Fig. 6). This genomic region showed striking reciprocity in  
 478 phenotype compared to the SKN-1 results, as described below.

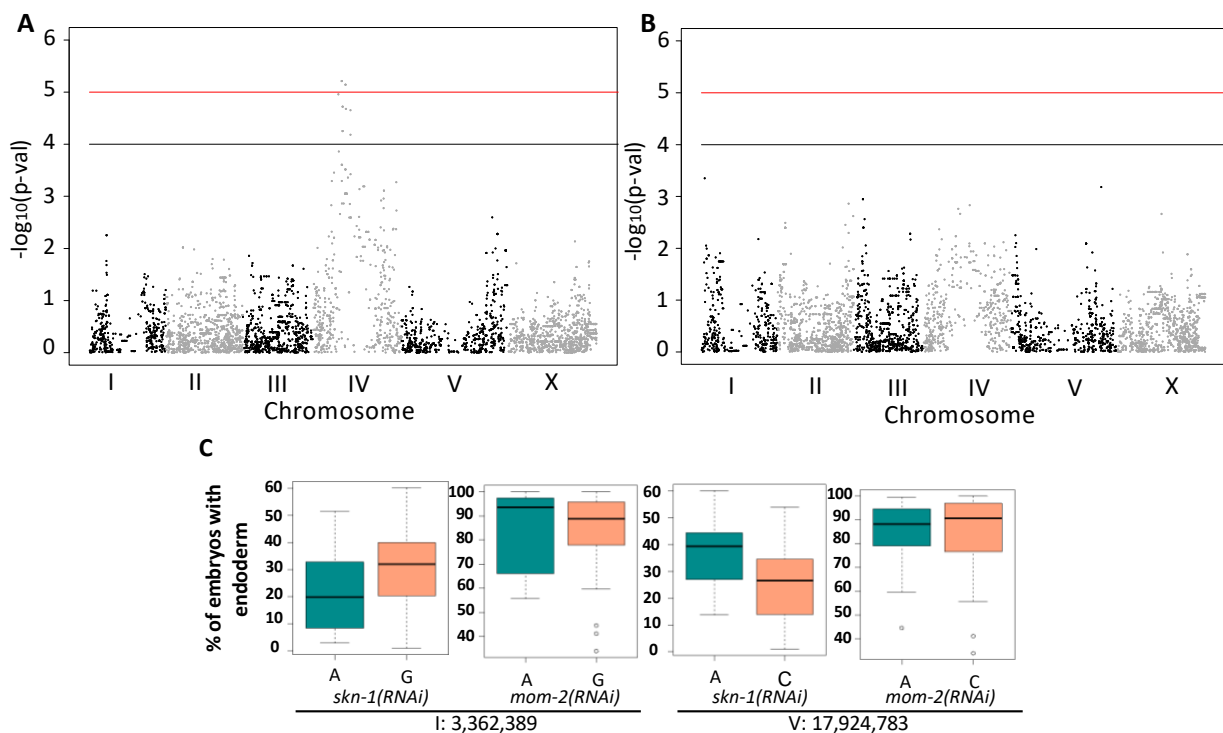

479

480 **Fig. 5. Genome-Wide Association Studies of *skn-1(RNAi)* and *mom-2(RNAi)* phenotypes.**

481 (A) Manhattan plot of *skn-1(RNAi)* EMMA. The red line indicates a genome-wide 1.5% FDR (permutation-  
 482 based FDR, from 10,000 permuted results). Black line represents 3.0% FDR. The chromosomes are color-  
 483 coded. The y axis is the  $-\log_{10}$  of p-value. (B) Manhattan plot of *mom-2(RNAi)* EMMA. The y axis is the  $-\log_{10}$   
 484 of p-value. Genomic regions are shown on the x-axis. (C) Effect plots of the significant SNPs from  
 485 *skn-1(RNAi)* GWAS at position 3,362,389 bp on chromosome I and position 17,924,783 bp on chromosome  
 486 V (see Supplemental Fig. 3). Horizontal lines within each box represent the median, and the boxes  
 487 represent 25th–75th percentile.

488 In an effort to narrow in on causal loci underlying the *skn-1(-)* and *mom-2(-)*  
 489 phenotypic variation, and to assess possible relationships between these two GRN inputs, we  
 490 prepared and analyzed 95 recombinant inbred lines (RILs) between two *C. elegans* isotypes,  
 491 N2 and MY16. These strains were chosen for their widely varying differences in requirement  
 492 for both SKN-1 and MOM-2 (see Materials and Methods). In contrast to the very low variation

493 seen between multiple trials of each parental strain, analysis of the RNAi treated RIL strains  
494 (>500 embryos/RIL) revealed a very broad distribution of phenotypes. We found that, while  
495 some RILs gave phenotypes similar to that of the two parents, many showed intermediate  
496 phenotypes and some were reproducibly more extreme than either parent, indicative of  
497 transgressive segregation [67]. For *skn-1(RNAi)*, the phenotype varied widely across the RILs,  
498 with 1 to 47% of embryos containing gut (Fig. 6A). This effect was even more striking with  
499 *mom-2(RNAi)*, for which virtually the entire possible phenotypic spectrum was observed  
500 across a selection of 31 RILs representing the span of *skn-1(RNAi)* phenotypes. The *mom-*  
501 *2(RNAi)* phenotypes ranged from RILs showing 3% of embryos with gut to those showing 92%  
502 (Fig. 6A). It is noteworthy that one RIL (JR3572, Supplemental File 2) showed a nearly  
503 completely penetrant gutless phenotype, an effect that is much stronger than has been  
504 previously observed for *mom-2(-)* [29]. These results indicate that a combination of natural  
505 variants can nearly eliminate a requirement for MOM-2 altogether, while others make it  
506 virtually essential for endoderm development. Collectively, these analyses reveal that  
507 multiple quantitative trait loci (QTL) underlie SKN-1- and MOM-2-dependent endoderm  
508 specification.

509 To identify QTLs from the recombinant population, we performed linkage mapping for  
510 both phenotypes using both interval mapping and marker regression. For *skn-1(RNAi)*, two  
511 major peaks were revealed on chromosomes II and IV (above 1% FDR estimated from 1,000  
512 permutations). Two minor loci were found on chromosomes I and X (suggestive linkage,  
513 above 20% FDR) (Fig 6B). For *mom-2(RNAi)*, two major independent QTL peaks were found  
514 on Chromosomes I and II (above the 5% FDR estimated from 1,000 permutations). Although  
515 the candidate peaks observed on Chromosome IV for *skn-1(RNAi)* (Fig. 6B) did not appear to  
516 overlap with those for *mom-2(RNAi)*, overlap was observed between the Chromosomes I and

517 II candidate regions for these two phenotypes. Moreover, many N2 and MY16 alleles in the  
 518 QTL showed a reciprocal effect on SKN-1 and MOM-2 dependence (Fig. 6C-F).

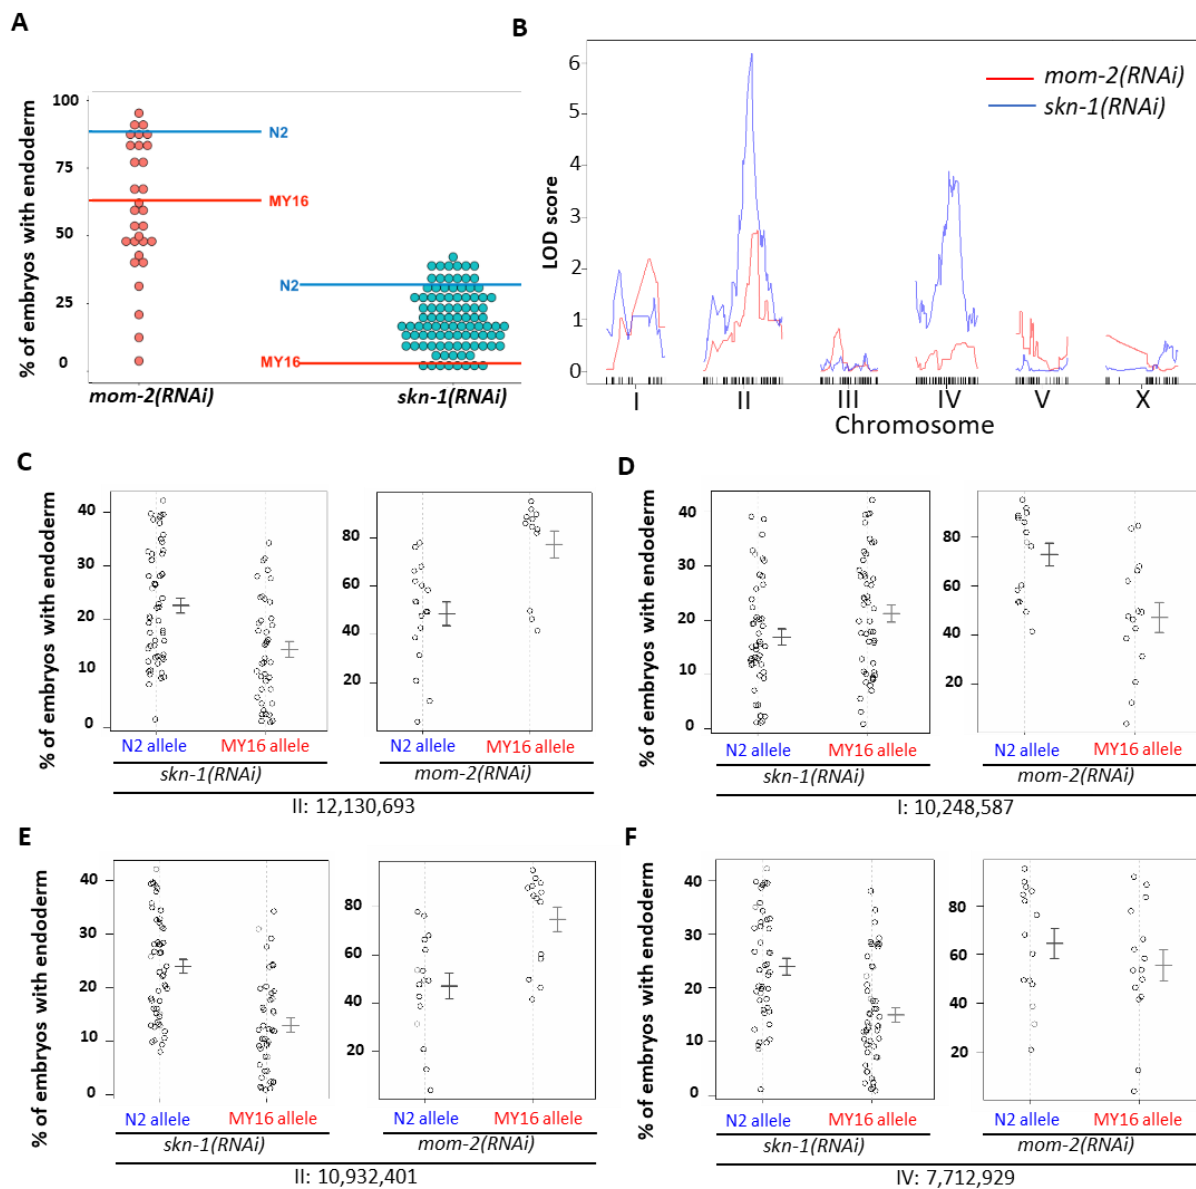

519  
 520 **Fig 6. Quantitative genetic analysis of *mom-2(RNAi)* and *skn-1(RNAi)* phenotype in Recombinant Inbred**  
 521 **Lines (RILs) between N2 and MY16.**

522 (A) *mom-2(RNAi)* (left) and *skn-1(RNAi)* (right) phenotype of RILs. The phenotype of the parental strains,  
 523 MY16 and N2 are shown by red and blue lines, respectively. (B) QTL analyses (interval mapping) of *skn-*  
 524 *1(RNAi)* (blue line) and *mom-2(RNAi)* (red line) phenotype shown in (A). Genomic regions are shown on the  
 525 x-axis and LOD score is shown on the y-axis. (C-F) Effect plots of significant SNPs from *mom-2(RNAi)* (C, D)  
 526 and *skn-1(RNAi)* (E, F) QTL analyses of RILs. Each dot represents a RIL. The parental alleles are shown on  
 527 the x-axis, and *skn-1(RNAi)* or *mom-2(RNAi)* phenotypes on the y-axis. Confidence intervals for the average  
 528 phenotype in each genotype group are shown.

529

530 **A cryptic compensatory relationship between the SKN-1 and Wnt regulatory inputs**

531

532 As with *skn-1(RNAi)* findings, we found no correlation between the *mom-2(RNAi)* phenotype  
533 and phylogenetic relatedness or geographical distribution (Supplementary Fig. 7A, B),  
534 suggesting rapid intraspecies developmental system drift. This, together with the preceding  
535 findings, unveiled wide cryptic variation in the requirements for both SKN-1 and MOM-2/Wnt  
536 in the endoderm GRN and raised the possibility of a functional overlap in this variation.  
537 Comparisons of the GWAS and QTL mapping results for *skn-1* and *mom-2* showed an overlap  
538 in candidate QTL regions on chromosome I, II and IV (Fig. 5, Fig 6, Supplemental Fig. 6),  
539 suggesting a possible relationship between the genetic basis underlying these two traits. It is  
540 conceivable that some genetic backgrounds are generally more sensitive to loss of either  
541 input (e.g, the threshold for activating the GRN is higher) and others more robust to single-  
542 input loss. Alternatively, a higher requirement for one input might be associated with a  
543 relaxed requirement for the other, i.e., a reciprocal relationship.

544 As an initial assessment of these alternatives, we examined whether the requirements  
545 for SKN-1 and MOM-2 across all strains were significantly correlated. This analysis revealed  
546 no strong relationship between the cryptic variation in the requirement for these inputs seen  
547 across all the strains (Spearman correlation  $R=0.18$ ,  $p\text{-value}=0.07$ ) (Fig. 7A). This apparent lack  
548 of correlation at the level of strains is not unexpected, as many factors likely contribute to the  
549 cryptic variation and the comparison reflects the collective effect of all causal loci in the  
550 genome of each strain.

551 We next sought to examine possible relationships between the two GRN inputs at  
552 higher resolution by comparing association of specific genetic regions with the quantitative  
553 requirement for each input. We took advantage of the available sequence data for all the

554 isotypes tested [40] and examined the impact of each allele on the *skn-1(RNAi)* and *mom-*  
555 *2(RNAi)* phenotypes for the SNPs that were most highly associated with the variation in  
556 requirement for SKN-1 by calculating the difference between the phenotypic medians for  
557 each allele at each SNP. Comparisons of the GWAS analyses for variation in the requirement  
558 for SKN-1 and MOM-2 showed a particularly strong overlap in candidate QTL regions for the  
559 two phenotypes on chromosome IV (Fig. 5A, B, Supplemental Fig. 3A, 5, 6). To assess the  
560 relationship between these and other significant SNPs, we analyzed the top 45 SNPs from the  
561 *mom-2* GWAS data and found a strong negative correlation between the allelic effects for  
562 SKN-1 and MOM-2 dependence. With very few exceptions, SNPs associated with a milder *skn-*  
563 *1(RNAi)* phenotype (higher % with endoderm) showed a stronger *mom-2(RNAi)* phenotype  
564 (low %) and *vice versa* (Fig. 7B), with an overall highly significant negative correlation  
565 (Pearson's correlation  $R=-0.6099$ ,  $p\text{-value}=0.0001$ ).

566         The strong negative correlation we observed between the strength of the *skn-1(RNAi)*  
567 and *mom-2(RNAi)* phenotypes for the SNPs that are most significantly associated with the  
568 variation might be explained in part by the large blocks of linkage disequilibrium observed in  
569 *C. elegans* [40]. Thus, in principle, relatively few genomic regions might, by chance, show the  
570 reciprocal relationship, in which case all linked high-significance SNPs would similarly show  
571 the negative correlation. It was therefore important to assess how widespread and consistent  
572 this effect is across the entire genome. We dissected the relationship of the SKN-1 and MOM-  
573 2 requirements across all chromosomes by analyzing the phenotypic strength in sliding  
574 windows of 50 SNPs each across each chromosome, using all 4,690 SNPs. This analysis  
575 revealed a striking overall trend: for all six chromosomes, regions associated with high SKN-1  
576 requirement showed a tendency toward lower MOM-2/Wnt requirement and *vice-versa*. This  
577 effect was most pronounced on chromosome I, which showed a very strong negative

578 correlation ( $R=-0.69$ ). The effect was also clearly evident on chromosomes IV ( $R=-0.55$ ), III ( $R=-$   
 579  $0.45$ ), and II ( $R=-0.43$ ). Though weaker for chromosomes V and X ( $R=-0.23$  for both), the  
 580 correlation was nonetheless negative for these chromosomes as well (Fig. 7C-E; Supplemental  
 581 Fig. 8A-E). Thus, the inverse relationship between the MOM-2 and SKN-1 requirement  
 582 appears to be distributed across the entire genome. The sequences underlying the cryptic  
 583 variation we observed might not be expected to be uniformly distributed throughout the  
 584 genome and, indeed, we found that strength of the correlation varied widely between and  
 585 even within chromosomes (Fig. 7C-E, Supplemental Fig. 8B-E).

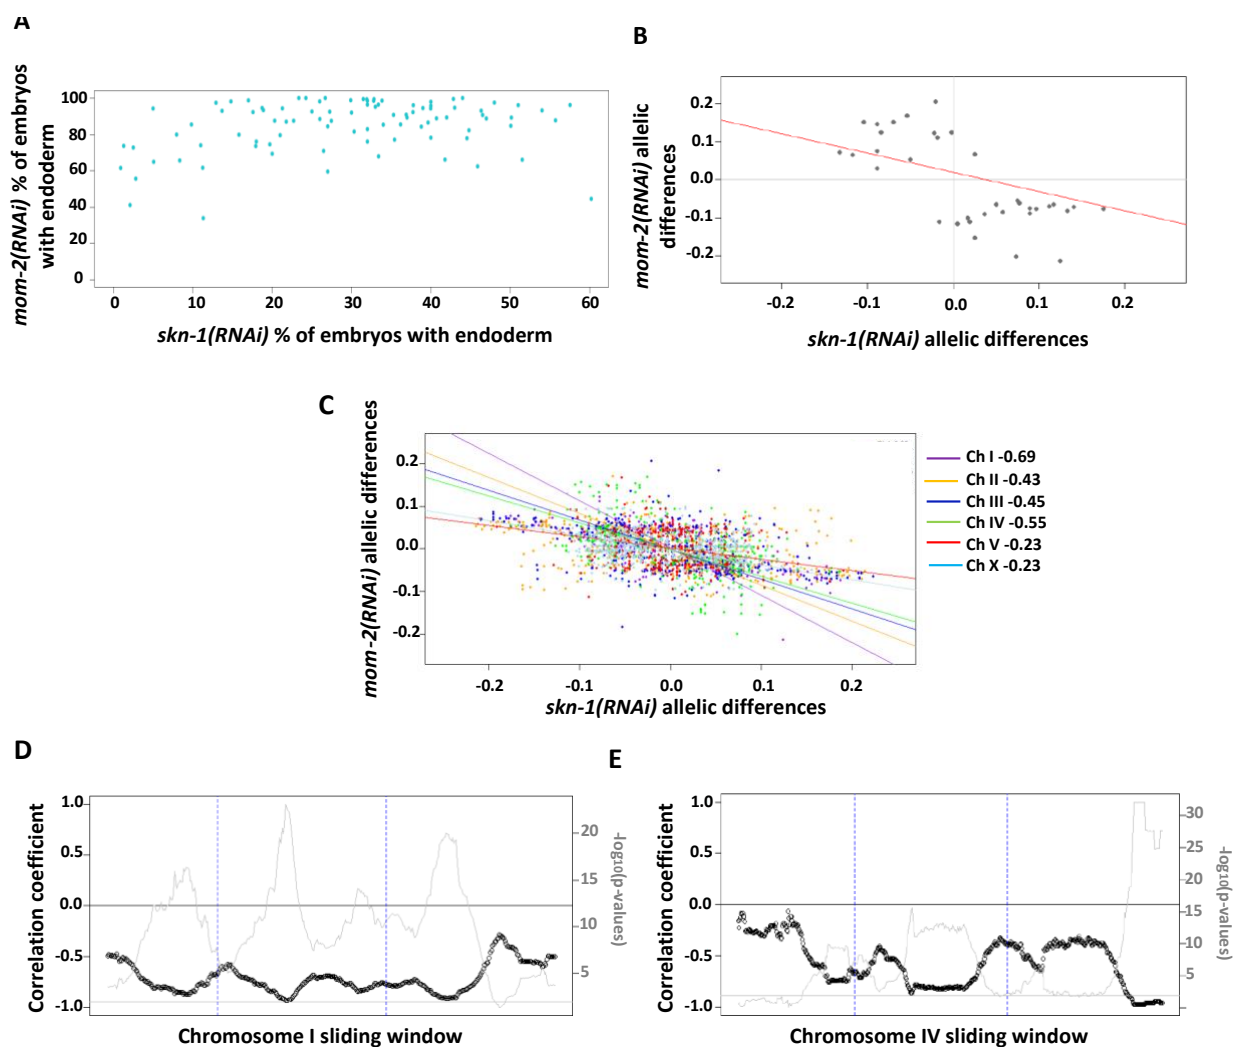

586

587 **Fig. 7: Negative correlation of *skn-1(RNAi)* and *mom-2(RNAi)* allelic differences.**

588 (A) Comparison of *skn-1(RNAi)* and *mom-2(RNAi)* phenotype in 94 strains tested. No correlation was found  
589 (Spearman correlation  $R=0.1844$ ,  $p\text{-value}=0.07$ ). Each dot corresponds to a wild isolate. Y-axis, *skn-1(RNAi)*  
590 phenotype, x-axis, *mom-2(RNAi)* phenotype. (B) Negative correlation of *skn-1(RNAi)* and *mom-2(RNAi)*  
591 allelic differences at the top SNPs from the *mom-2(RNAi)* GWAS as calculated by subtracting the median  
592 (of the *skn-1(RNAi)* and *mom-2(RNAi)* phenotypes) of one allele to the median of the second. Pearson's  
593 correlation  $R=-0.6099$ ,  $p\text{-value}=0.0001$ . (C) Genome-wide negative correlation in allelic effects. Each dot  
594 represents a SNP, and 4,690 SNPs in total were analyzed. The chromosomes and their corresponding  
595 regression lines are color-coded. The R-value of each chromosome is indicated. Correlation sliding window  
596 of (D) chromosome I and (E) chromosome IV. Windows of 50 SNPs were used to calculate the correlation  
597 coefficient and p-value. Black circles represent the correlation coefficient (R value) for each window (scale  
598 on the x-axis). Black line indicates the 0 threshold. Grey line represents the  $-\log_{10}$  of the p-values for the  
599 corresponding correlation windows (scale on the y-axis). Grey horizontal line is the significance threshold  
600 set at  $p\text{-value}=0.01$ . Blue dotted lines divide chromosomal region into left, middle and right arms.

### 601 **Multiple factors reciprocally regulate the requirement for SKN-1 and MOM-2/Wnt**

602 We further explored this relationship between the requirement for SKN-1 and MOM-  
603 2 by testing other candidate genes implicated in endoderm development [68–70]. We found  
604 that loss of RICT-1, the *C. elegans* orthologue of the human RICTOR (Rapamycin-insensitive  
605 companion of mTOR; [71]), a component of the TORC2 complex, which has been shown to  
606 antagonize SKN-1 function [68], results in opposite effects on *skn-1(-)* and *mom-2(-)* mutants  
607 (Fig. 8A). Specifically, while *riect-1(RNAi)* suppresses the absence of gut in *skn-1(zu67)* embryos  
608 (*skn-1(zu67)*: 34.3%  $\pm$  s.d 4.1% with gut vs. *skn-1(zu67); rict-1(RNAi)*: 48.3%  $\pm$  s.d 4.9%;  
609  $p<0.001$ ), we found that it *enhances* this phenotype in *mom-2(or42)* mutants (*mom-2(or42)*:  
610 23.8%  $\pm$  s.d 2.0%; vs. *mom-2(or42); rict-1(RNAi)*: 11.2%  $\pm$  s.d 3.2%;  $p<0.001$ ). Confirming this  
611 effect, a similar outcome was observed when SKN-1 was depleted by RNAi in *riect-1(ft7)*  
612 chromosomal mutants (*skn-1(RNAi)*: 31.6%  $\pm$  s.d 4.3% with gut vs. *riect-1(ft7); skn-1(RNAi)*:  
613 45.9%  $\pm$  s.d 6.3%;  $p<0.05$ ) (Fig. 8A). Similarly, RNAi depletion of PLP-1, the *C. elegans*  
614 homologue of the Pur alpha transcription factor that has been shown to bind to and regulate  
615 the *end-1* promoter [69], reciprocally affects the outcome of removing these two inputs in  
616 the same direction: loss of PLP-1 function suppresses the *skn-1(-)* phenotype (to 48.0%  $\pm$  s.d  
617 6.6%), and strongly enhances the *mom-2* phenotype (to 6.9%  $\pm$  s.d 1.6%). Again, this result

618 was confirmed by RNAi of *skn-1* in a *plp-1(ok2156)* chromosomal mutant (Fig. 8B). Thus, as  
619 observed with the effect across the genome with natural variants, we observed a striking  
620 reciprocal effect of both of these genes on loss of SKN-1 and MOM-2.

621 We also observed a reciprocal effect on the SKN-1 and Wnt inputs with MIG-  
622 5/*dishevelled*, a component of the Wnt pathway that acts downstream of the Wnt receptor  
623 [70]; however, in this case the effect was in the opposite direction as seen for RICT-1 and PLP-  
624 1. Loss of MIG-5 as a result of chromosomal mutation or RNAi leads to *enhancement* of the  
625 *skn-1(-)* phenotype (*mig-5(rh94); skn-1(RNAi)*: 6.6% ± s.d 2.3%; *skn-1(zu67); mig-5(RNAi)*:  
626 9.4% ± s.d 1.4%) and *suppression* of the *mom-2(-)* phenotype (88.6% ± s.d 4.0%) (Fig 8C).

627 Together, these findings reveal that, as observed with the natural variant alleles  
628 (Fig.5C, Fig. 6C-F; Fig. 7B, C), RICT-1, PLP-1, and MIG-5 show opposite effects on the  
629 phenotype of removing SKN-1 and MOM-2, suggesting a prevalence of genetic influences that  
630 reciprocally influence the outcome in the absence of these two inputs.



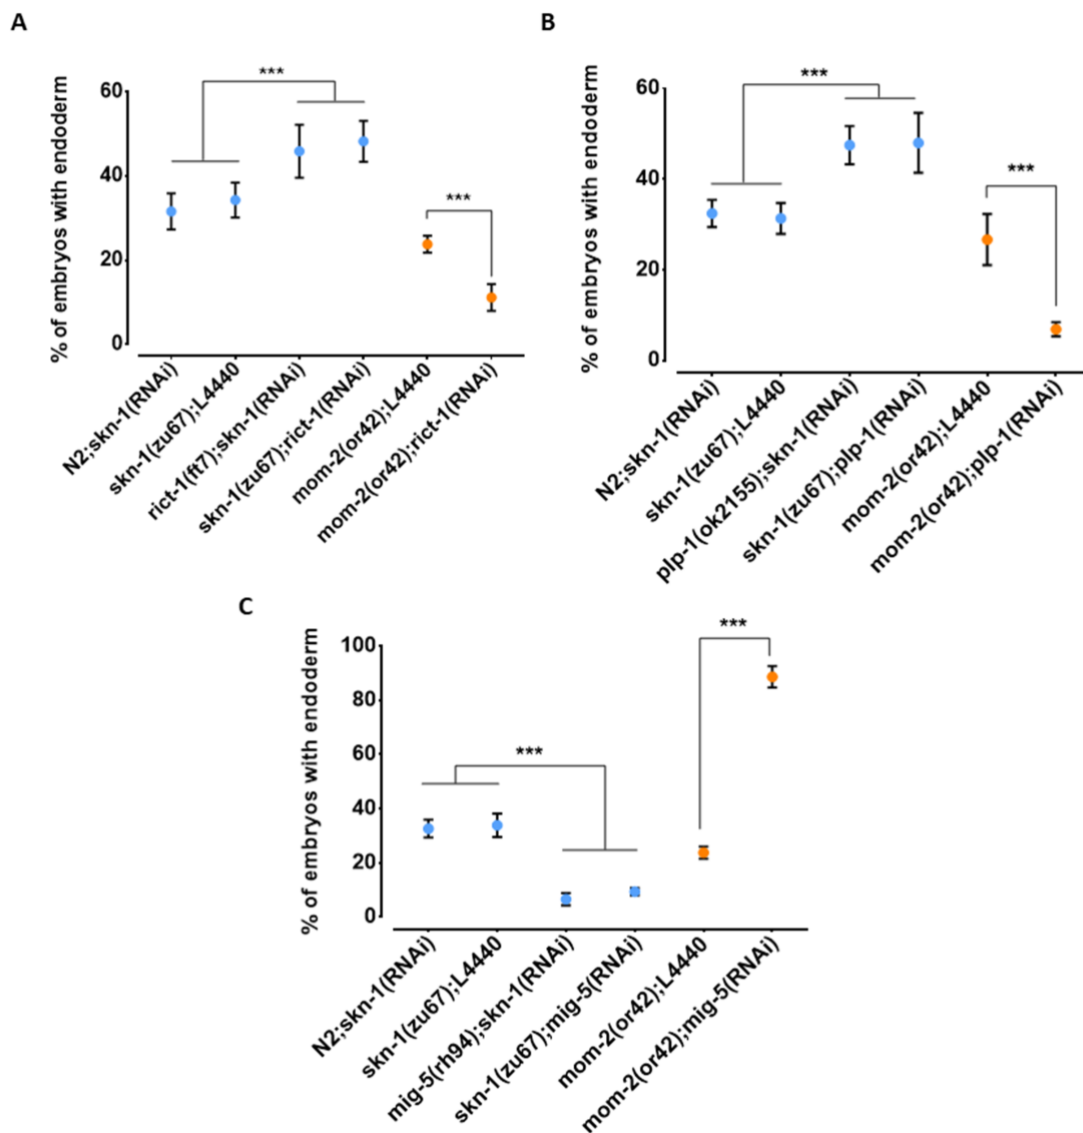

631  
632

**Fig 8. Reciprocal effects of RICT-1, PLP-1, and MIG-5 on *skn-1(-)* and *mom-2(-)* phenotypes**

633 (A, B) Loss of RICT-1 or PLP-1 enhances the *mom-2(or42)* loss-of-endoderm phenotype and suppresses  
634 *skn-1(zu67)* and *skn-1(RNAi)* phenotype. (C) Loss of MIG-5 enhances the *skn-1(zu67)* and *skn-1(RNAi)*  
635 phenotype and suppresses *mom-2(or42)* phenotype. At least three replicates were performed per  
636 experiment. Student t-test (\*\*\*) p-value<0.001). Data represented with Standard Deviations.

637

## 638 DISCUSSION

639           The remarkable variety of forms associated with the ~36 animal phyla [72] that  
640 emerged from a common metazoan ancestor >600 Mya is the product of numerous  
641 incremental changes in GRNs underlying the formation of the body plan and cell types. Here,  
642 we describe an unexpectedly broad divergence in the deployment of SKN-1/Nrf and MOM-  
643 2/Wnt signaling in generating the most ancient germ layer, the endoderm, within wild isolates  
644 of a single animal species, *C. elegans*. In this study, we report five major findings: 1) while the  
645 quantitative requirement for two distinct regulatory inputs that initiate expression of the  
646 endoderm GRN (SKN-1 and MOM-2) are highly reproducible in individual *C. elegans* isolates,  
647 there is wide cryptic variation between isolates. 2) Cryptic variation in the requirement for  
648 these regulatory factors shows substantial differences even between closely related strains,  
649 suggesting that these traits are subject to rapid evolutionary change in this species. 3)  
650 Quantitative genetic analyses of natural and recombinant populations revealed multiple loci  
651 underlying the variation in the requirement for SKN-1 and MOM-2 in endoderm specification.  
652 4) The quantitative requirements for SKN-1 and MOM-2 in endoderm specification are  
653 negatively correlated across the genome, as shown by allelic effect analysis, implying a  
654 reciprocal requirement for the two inputs. 5), *rict-1*, *plp-1*, and *mig-5* reciprocally influence  
655 the outcome of *skn-1(-)* and *mom-2(-)*, substantiating the reciprocal influences on the two  
656 GRN inputs. These findings reveal substantial plasticity and complexity underlying SKN-1 and  
657 MOM-2/Wnt regulatory inputs in mobilizing a conserved system for endoderm specification.

658           Together, these findings indicate that, while the core genetic toolkit for the  
659 development of the endoderm, the most ancient of the three germ layers, appears to have  
660 been preserved for well over half a billion years, the molecular regulatory inputs that initiate

661 its expression in *C. elegans* vary extremely rapidly over short evolutionary time scales within  
662 the species.

### 663 **Evolutionary plasticity in maternal regulators of embryonic GRNs**

664 The finding that the key regulatory inputs that initiate the endoderm GRN show  
665 dramatic plasticity is in accordance with the “hourglass” concept of embryonic development  
666 [73–75], in which divergent developmental mechanisms converge on a more constant state  
667 (i.e., a “phylotypic stage” at the molecular regulatory level). Indeed, it appears that a  
668 downstream GATA factor cascade that directs endoderm specification and differentiation is  
669 a highly conserved feature not only across *Caenorhabditis* species [38,76,77] but, in fact, across  
670 the broad spectrum of animal phyla [12–17]. These observations are also consistent with the  
671 notion that, while the late stages in organ differentiation involve activation of a very large  
672 number of target differentiation genes by a limited set of transcription factors, thereby  
673 restricting evolutionary divergence at that stage in the regulatory circuitry, the early stages  
674 involve the action of transcription factors on far fewer target genes, hence allowing for much  
675 greater evolutionary plasticity [21].

676 In *Drosophila*, early maternally acting genes show more rapid evolution than those  
677 expressed zygotically [78]. Moreover, maternal patterning systems that spatially regulate  
678 conserved patterning gene networks between broadly divergent insect species are highly  
679 divergent [79,80]. Further comparisons of early embryonic transcripts across many  
680 *Drosophila* species and *Aedes aegypti* revealed that maternal transcript pools that, like those  
681 of *C. elegans* *skn-1*, are present only transiently during early embryogenesis, and expression  
682 levels are highly variable across these species, spanning ~60 My of evolution [81]. What is  
683 particularly striking about our findings is that the varying requirement for key maternal

684 regulatory components is seen within the relatively recent radiation of a single species with  
685 low genetic diversity [40]. Variation in gene expression predicts phenotypic severity of  
686 mutations in different genetic backgrounds [82]. As quantitative transcriptional profiling of *C.*  
687 *elegans* isotypes advances, it will be of interest to assess whether the highly evolvable  
688 requirement for maternal regulatory inputs into the endoderm GRN similarly correlates with  
689 rapid divergence in quantitative levels of maternal transcripts that are transiently deployed  
690 in early embryos of this species.

### 691 **Multigenic variation in the requirement for SKN-1 and MOM-2**

692 GWAS and EMMA revealed several major candidate QTLs (Fig. 5, Supplemental Fig. 3,  
693 5), implying that multigenic factors are causally responsible for the differences in requirement  
694 for SKN-1 and MOM-2 between isotypes. This multigenic influence was also apparent from  
695 analysis of RILs derived from N2 and MY16 parental strains, which identified several loci  
696 associated with both traits. In addition, we found substantial epistasis between the different  
697 genomic regions underlying this variation. Transgressive segregation of the requirement for  
698 both SKN-1 and MOM-2 was seen in the RIL sets (Fig. 6A). For example, the MY16 strain which  
699 shows an almost fully penetrant requirement for SKN-1 for gut development, appear to  
700 harbor cryptic variants that suppress the requirement for SKN-1, allowing enhanced gut  
701 development when combined with genetic factors in the N2 strain.

702 We observed substantial overlap on chromosome IV in the GWAS/EMMA analyses of  
703 the *skn-1* and *mom-2* requirements in wild isotypes (Fig. 5, Supplemental Fig. 6) and on  
704 chromosome II from analyses using RILs (Fig. 6B). This finding raises the possibility that some  
705 QTLs may influence requirement for both inputs into the endoderm specification pathway: as  
706 SKN-1 and Wnt converge to regulate expression of the *end-1/3* genes, it is conceivable that

707 common genetic variants might modulate the relative strength or outcome of both maternal  
708 inputs. However, our findings do not resolve whether these genetic variants act  
709 independently to influence the maternal regulatory inputs.

710 Genetic interactions are often neglected in large-scale genetic association studies [83]  
711 owing in part to the difficulty in confirming them [84]. Many studies [85–88], including ours  
712 here, showed that epistasis can strongly influence the behavior of certain variants upon  
713 genetic perturbation. In addition, selection on pleiotropically acting loci facilitates rapid  
714 developmental system drift [87,89,90]. Together, epistasis and selection on pleiotropic loci  
715 play important roles in the evolution of natural populations [89–92].

#### 716 **Potential compensatory relationships between SKN-1 and MOM-2/Wnt**

717 Although we did not observe a direct correlation between the *skn-1(-)* and *mom-2(-)*  
718 phenotypes across the isotypes studied here, a clear inverse correlation was observed when  
719 testing associated individual SNPs in significantly linked loci (Fig. 7). This reciprocal effect seen  
720 across large portions of the genome may be attributable in part to the large LD blocks present  
721 on all chromosomes (Fig. 7, Supplemental Fig. 8) [40]. However, our finding that this effect is  
722 seen across the entire genome raises the possibility that the SKN-1 and MOM-2/Wnt inputs  
723 might compensate for each other and that genetic variants that enhance the requirement for  
724 one of the inputs relaxes the requirement for the other. This reciprocity might reflect cross-  
725 regulatory interactions between these two maternal inputs or may be the result of  
726 evolutionary constraints imposed by selection on these genes, which act pleiotropically in a  
727 variety of processes.

728 We identified two genes, *rict-1* and *plp-1*, that show similar inverse effects on the  
729 requirements from *skn-1* and *mom-2*: debilitation of either gene enhances the phenotype of

730 *mom-2(-)* and suppresses that of *skn-1(-)*. RICT-1 function extends lifespan in *C. elegans*  
731 through the action of SKN-1 [68], and loss of RICT-1 rescues the misspecification of the MS  
732 and E blastomeres and lethality of *skn-1(-)* embryos [68], consistent with our finding.  
733 However, the mechanism by which loss of *rict-1* synergizes with a defect in the Wnt pathway  
734 is not clear. We previously showed that PLP-1, a homologue of the vertebrate transcription  
735 factor pur alpha, binds to the *end-1* promoter and acts in parallel to the Wnt pathway and  
736 downstream of the MAPK signal [69], thereby promoting gut formation. PLP-1 shows a similar  
737 reciprocal relationship with SKN-1 and MOM-2 as with RICT-1 (Fig. 8). Given that PLP-1 binds  
738 at a *cis* regulatory site in *end-1* near a putative POP-1 binding site [69], and that SKN-1 also  
739 binds to the *end-1* regulatory region [64], it is conceivable that this reciprocity reflects  
740 integration of information at the level of transcription factor binding sites. As the architecture  
741 of the GRN is shaped by changes in *cis*-regulatory sequences [1,3], analyzing alterations in  
742 SKN-1 and Wnt/POP-1 targets among *C. elegans* wild isolates may provide insights into how  
743 genetic changes are accommodated without compromising the developmental output at  
744 microevolutionary time scale.

745         MIG-5, a *dishevelled* orthologue, functions in the Wnt pathway in parallel to Src  
746 signaling to regulate asymmetric cell division and endoderm induction [28,70]. We found that  
747 the loss of *mig-5* function enhances the gut defect of *skn-1(-)* and suppresses that of the *mom-*  
748 *2(-)*, the opposite reciprocal relationship to that of *rict-1* and *plp-1*, and consistent with a  
749 previous report (Fig. 8) [28]. These effects were not observed in embryos lacking function of  
750 *dsh-2*, the orthologue of *mig-5* (data not shown), supporting a previous study that showed  
751 overlapping but non-redundant roles of MIG-5 and DSH-2 in EMS spindle orientation and gut  
752 specification [70]. Recent studies showed that Dishevelled can play both positive and negative  
753 roles during axon guidance [93,94]. Dishevelled, upon Wnt-activation, promotes

754 hyperphosphorylation and inactivation of Frizzled receptor to fine-tune Wnt activity. It is  
755 tempting to speculate that MIG-5 may perform similar function in EMS by downregulating  
756 activating signals (Src or MAPK), in the absence of MOM-2.

757         We hypothesize that compensatory mechanisms may evolve to fine-tune the level of  
758 gut-activating regulatory inputs. Successful developmental events depend on tight spatial and  
759 temporal regulation of gene expression. For example, anterior-posterior patterning in the  
760 *Drosophila* embryo is determined by the local concentrations of the Bicoid, Hunchback, and  
761 Caudal transcription factors [95]. We postulate that SKN-1 and Wnt signaling is modulated so  
762 that the downstream genes, *end-1/3*, which control specification and later differentiation of  
763 endoderm progenitors, are expressed at optimal levels that ensure normal gut development.  
764 Suboptimal END activity leads to poorly differentiated gut and both hypo- and hyperplasia in  
765 the gut lineage [96–98]. Hyper- or hypo-activation of Wnt signaling has been implicated in  
766 cancer development [99], bone diseases [100,101], and metabolic diseases [102,103],  
767 demonstrating the importance of regulating the timing and dynamics of such developmental  
768 signals within a quantitatively restricted window.

### 769 **Cryptic variation and evolvability of GRNs**

770         This study revealed substantial cryptic genetic modifications that alter the relative  
771 importance of two partially redundant inputs into the *C. elegans* endoderm GRN, leading to  
772 rapid change in the developmental network architecture (Fig. 9). Such modifications may  
773 occur through transitional states that are apparent even within the radiation of this single  
774 species. For example, the finding that POP-1 is not required for gut development even in a  
775 wild isolate (e.g., MY16) that, like *C. briggsae*, shows a near-absolute requirement for SKN-1  
776 may reflect a transitional state between the two species: *i.e.*, a nearly essential requirement

777 for SKN-1 but non-essential requirement for POP-1, an effect not previously seen in either  
778 species. In addition, duplicated GATA factors (the MEDs, ENDS, and ELTs) and partially  
779 redundant activating inputs (SKN-1, Wnt, Src, and MAPK) in endoderm GRN, provide an  
780 opportunity for genetic variation to accumulate and “experimentation” of new regulatory  
781 relationships without diminishing fitness [2,104,105].

782         Redundancy in the system may act to ‘rescue’ an initial mutation and allow for  
783 secondary mutations that might eventually lead to rewiring of the network. For example, loss  
784 of either MyoD or Myf5, two key regulators of muscle differentiation in metazoans, produces  
785 minimal defects in myogenesis as a result of compensatory relationship between the  
786 myogenic factors [106]. In vertebrates, gene duplication events have resulted in an expansion  
787 of Hox genes to a total of >200, resulting in prevalent redundancy [107–109]. This  
788 proliferation of redundant genes provides opportunities for evolutionary experimentation  
789 and subsequent specialization of new functions [109]. In *C. elegans*, loss of GAP-1 (a Ras  
790 inhibitor) or SLI-1 (a negative regulator of EGFR signaling) alone does not produce obvious  
791 defects, while double mutations lead to a multivulva phenotype [110]. Many other similar  
792 redundant relationships between redundant partners exist in the animal. Notably, the relative  
793 importance of Ras, Notch, and Wnt signals in vulva induction differ in various genetic  
794 backgrounds [6,65] and physiological conditions [111,112], resulting in flexibility in the  
795 system. While vulval development in *C. elegans*, when grown under standard laboratory  
796 conditions, predominantly favors utilization of the EGF/Ras signaling pathway [111], Wnt is  
797 the predominant signaling pathway in the related *Pristionchus pacificus*, which is ~250 MY  
798 divergent [113]. In addition, while *Cel-lin-17* functions positively to transduce the Wnt signal,  
799 *Ppa-lin-17/Fz* antagonizes Wnt signaling and instead the Wnt signal is transmitted by *Ppa-lin-*  
800 *18/Ryk*, which has acquired a novel SH3 domain not present in the *C. elegans* ortholog [114].



801 Thus, extensive rewiring of signaling networks and modularity of signaling motifs contribute  
802 to developmental systems drift.

803         The broad cryptic variation we have observed in this study may drive developmental  
804 system drift, giving rise to GRN architectures that differ in the relative strength of the network  
805 components. In the developmental hourglass model of evolvability of animal development,  
806 the early stages of embryonic development showed the least constraint in gene expression  
807 compared to either the phylotypic stage or post phylotypic stage. This is likely attributable  
808 either to positive selection during early embryonic and later larval stages or to developmental  
809 constraints. Analysis of developmental gene expression in mutation accumulation lines,  
810 which have evolved in the absence of any positive selection, showed similarity to the  
811 developmental hourglass model of evolvability, consistent with strong developmental  
812 constraints on the phylotypic stage [115]. However, they do not rule out the possibility that  
813 early and late stages of development might be more adaptive and therefore subject to  
814 positive selection. It will be of interest to learn the degree to which the divergence in network  
815 architecture might arise as a result of differences in the environment and selective pressures  
816 on different *C. elegans* isotypes.

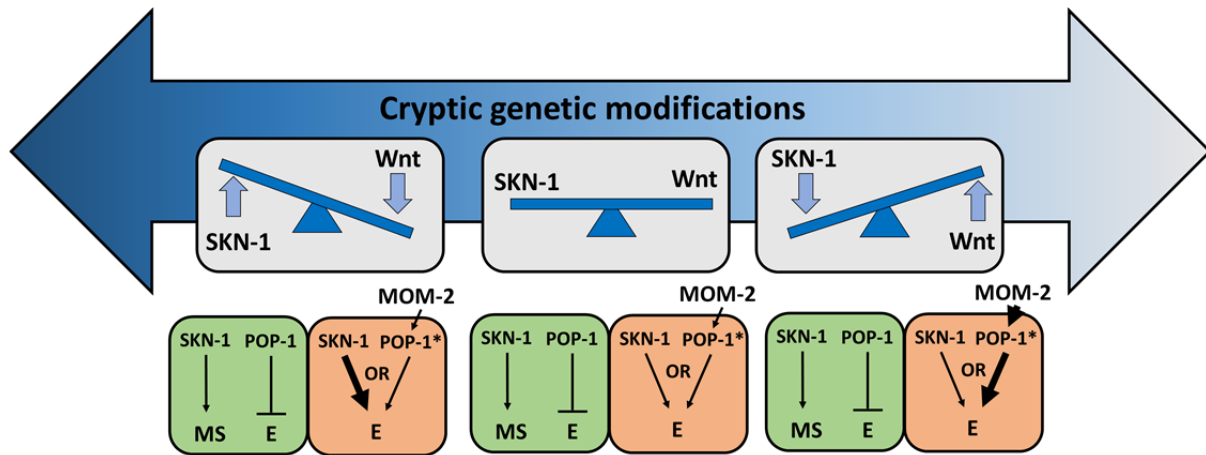

817

818 **Fig. 9. Simplified models accounting for cryptic compensatory relationship between the SKN-1 and**  
819 **MOM-2/Wnt regulatory inputs in the endoderm GRN.**

820 Accumulation of cryptic genetic modifications drives rapid rewiring of the GRN, causing broad variation of  
821 SKN-1 and MOM-2/Wnt dependence in endoderm (E) specification among *C. elegans* isotypes. Wnt-  
822 signaled POP-1 (indicated by \*) acts as an E activator, while unmodified POP-1 in the MS blastomere acts  
823 as a repressor of E fate in all *C. elegans* isotypes. The relative strength of the inputs is indicated by the  
824 thickness of the arrow.

825 **ACKNOWLEDGMENTS**

826 We thank members of the Rothman, especially Sagen Flowers and Kristoffer C. Mellinger for  
827 experimental assistance, and Snell labs, particularly Dr. Kien Ly, for helpful advice and  
828 feedback. We thank Dr. Kathy Ruggiero (University of Auckland, New Zealand) for helpful  
829 advice on GWAS methodology and Dr. James McGhee (University of Calgary, Canada) for  
830 providing the MH33 antibody. Nematode strains used in this work were provided by the  
831 Caenorhabditis Genetics Center, which is funded by the National Institutes of Health - Office  
832 of Research Infrastructure Programs (P40 OD010440). Y.N.T.C was supported during part of  
833 this work by a University of Auckland Doctoral Scholarship. This work was supported by grants  
834 from the NIH (#1R01HD082347 and # 1R01HD081266) to J.H.R.

835 **COMPETING INTERESTS**

836 The authors declare no competing or financial interests.

837

838 **REFERENCES**

- 839 1. Peter IS, Davidson EH. Evolution of gene regulatory networks controlling body plan  
840 development. *Cell*. Elsevier; 2011;144: 970–85. doi:10.1016/j.cell.2011.02.017
- 841 2. Félix M-A, Wagner A. Robustness and evolution: concepts, insights and challenges  
842 from a developmental model system. *Heredity (Edinb)*. Nature Publishing Group;  
843 2008;100: 132–140. doi:10.1038/sj.hdy.6800915
- 844 3. Davidson EH, Levine MS. Properties of developmental gene regulatory networks. *Proc*  
845 *Natl Acad Sci U S A*. National Academy of Sciences; 2008;105: 20063–6.  
846 doi:10.1073/pnas.0806007105
- 847 4. Oliveri P, Tu Q, Davidson EH. Global regulatory logic for specification of an embryonic  
848 cell lineage. *Proc Natl Acad Sci U S A*. National Academy of Sciences; 2008;105: 5955–  
849 62. doi:10.1073/pnas.0711220105
- 850 5. Peter IS, Davidson EH. Assessing regulatory information in developmental gene  
851 regulatory networks. *Proc Natl Acad Sci U S A*. National Academy of Sciences;  
852 2017;114: 5862–5869. doi:10.1073/pnas.1610616114
- 853 6. Milloz J, Duveau F, Nuez I, Felix M-A. Intraspecific evolution of the intercellular  
854 signaling network underlying a robust developmental system. *Genes Dev*. 2008;22:  
855 3064–3075. doi:10.1101/gad.495308
- 856 7. Nunes MDS, Arif S, Schlötterer C, McGregor AP. A perspective on micro-evo-devo:  
857 progress and potential. *Genetics*. *Genetics*; 2013;195: 625–34.  
858 doi:10.1534/genetics.113.156463
- 859 8. Phinchongsakuldit J, MacArthur S, Brookfield JFY. Evolution of Developmental Genes:

- 860 Molecular Microevolution of Enhancer Sequences at the Ubx Locus in *Drosophila* and  
861 Its Impact on Developmental Phenotypes. *Mol Biol Evol.* 2003;21: 348–363.  
862 doi:10.1093/molbev/msh025
- 863 9. Hashimshony T, Feder M, Levin M, Hall BK, Yanai I. Spatiotemporal transcriptomics  
864 reveals the evolutionary history of the endoderm germ layer. *Nature.* Nature  
865 Publishing Group; 2015;519: 219–222. doi:10.1038/nature13996
- 866 10. Rodaway A, Patient R. Mesendoderm: An Ancient Germ Layer? *Cell.* Cell Press;  
867 2001;105: 169–172. doi:10.1016/S0092-8674(01)00307-5
- 868 11. Peterson KJ, Lyons JB, Nowak KS, Takacs CM, Wargo MJ, McPeck MA. Estimating  
869 metazoan divergence times with a molecular clock. *Proc Natl Acad Sci U S A.* National  
870 Academy of Sciences; 2004;101: 6536–41. doi:10.1073/pnas.0401670101
- 871 12. Martindale MQ, Pang K, Finnerty JR. Investigating the origins of triploblasty:  
872 “mesodermal” gene expression in a diploblastic animal, the sea anemone  
873 *Nematostella vectensis* (phylum, Cnidaria; class, Anthozoa). *Development.* The  
874 Company of Biologists Ltd; 2004;131: 2463–74. doi:10.1242/dev.01119
- 875 13. Boyle MJ, Seaver EC. Developmental expression of *foxA* and *gata* genes during gut  
876 formation in the polychaete annelid, *Capitella* sp. I. *Evol Dev.* 2008;10: 89–105.  
877 doi:10.1111/j.1525-142X.2007.00216.x
- 878 14. Boyle MJ, Seaver EC. Expression of *FoxA* and *GATA* transcription factors correlates  
879 with regionalized gut development in two lophotrochozoan marine worms:  
880 *Chaetopterus* (Annelida) and *Themiste lageniformis* (Sipuncula). *Evodevo.* 2010;1: 2.  
881 doi:10.1186/2041-9139-1-2

- 882 15. Gillis WJ, Bowerman B, Schneider SQ. Ectoderm- and endomesoderm-specific GATA  
883 transcription factors in the marine annelid *Platynereis dumerilli*. *Evol Dev.* 2007;9:  
884 39–50. doi:10.1111/j.1525-142X.2006.00136.x
- 885 16. Davidson EH, Rast JP, Oliveri P, Ransick A, Calestani C, Yuh C-H, et al. A Provisional  
886 Regulatory Gene Network for Specification of Endomesoderm in the Sea Urchin  
887 Embryo. *Dev Biol.* 2002;246: 162–190. doi:10.1006/dbio.2002.0635
- 888 17. Shoichet SA, Malik TH, Rothman JH, Shivdasani RA. Action of the *Caenorhabditis*  
889 *elegans* GATA factor END-1 in *Xenopus* suggests that similar mechanisms initiate  
890 endoderm development in ecdysozoa and vertebrates. *Proc Natl Acad Sci U S A.*  
891 National Academy of Sciences; 2000;97: 4076–81. Available:  
892 <http://www.ncbi.nlm.nih.gov/pubmed/10760276>
- 893 18. Sulston JE, Schierenberg E, White JG, Thomson JN. The embryonic cell lineage of the  
894 nematode *Caenorhabditis elegans*. *Dev Biol.* 1983;100: 64–119. Available:  
895 <http://www.ncbi.nlm.nih.gov/pubmed/6684600>
- 896 19. Bowerman B, Eaton BA, Priess JR. *skn-1*, a maternally expressed gene required to  
897 specify the fate of ventral blastomeres in the early *C. elegans* embryo. *Cell.* 1992;68:  
898 1061–75. Available: <http://www.ncbi.nlm.nih.gov/pubmed/1547503>
- 899 20. Bowerman B, Draper BW, Mello CC, Priess JR. The maternal gene *skn-1* encodes a  
900 protein that is distributed unequally in early *C. elegans* embryos. *Cell.* Elsevier;  
901 1993;74: 443–52. doi:10.1016/0092-8674(93)80046-H
- 902 21. Maduro MF, Rothman JH. Making Worm Guts: The Gene Regulatory Network of the  
903 *Caenorhabditis elegans* Endoderm. *Dev Biol.* Academic Press; 2002;246: 68–85.

904 doi:10.1006/DBIO.2002.0655

905 22. Maduro MF, Broitman-Maduro G, Mengarelli I, Rothman JH. Maternal deployment of  
906 the embryonic SKN-1 → MED-1,2 cell specification pathway in *C. elegans*. *Dev Biol.*  
907 Academic Press; 2007;301: 590–601. doi:10.1016/J.YDBIO.2006.08.029

908 23. Maduro MF, Meneghini MD, Bowerman B, Broitman-Maduro G, Rothman JH.  
909 Restriction of mesendoderm to a single blastomere by the combined action of SKN-1  
910 and a GSK-3beta homolog is mediated by MED-1 and -2 in *C. elegans*. *Mol Cell.*  
911 2001;7: 475–85. Available: <http://www.ncbi.nlm.nih.gov/pubmed/11463373>

912 24. Maduro MF. Gut development in *C. elegans*. *Semin Cell Dev Biol.* 2017;66: 3–11.  
913 doi:10.1016/j.semcdb.2017.01.001

914 25. Wiesenfahrt T, Osborne Nishimura E, Berg JY, McGhee JD. Probing and rearranging  
915 the transcription factor network controlling the *C. elegans* endoderm. *Worm.* 2016;5:  
916 e1198869. doi:10.1080/21624054.2016.1198869

917 26. Meneghini MD, Ishitani T, Carter JC, Hisamoto N, Ninomiya-Tsuji J, Thorpe CJ, et al.  
918 MAP kinase and Wnt pathways converge to downregulate an HMG-domain repressor  
919 in *Caenorhabditis elegans*. *Nature.* Nature Publishing Group; 1999;399: 793–797.  
920 doi:10.1038/21666

921 27. Shin TH, Yasuda J, Rocheleau CE, Lin R, Soto M, Bei Y, et al. MOM-4, a MAP kinase  
922 kinase kinase-related protein, activates WRM-1/LIT-1 kinase to transduce  
923 anterior/posterior polarity signals in *C. elegans*. *Mol Cell.* 1999;4: 275–80. Available:  
924 <http://www.ncbi.nlm.nih.gov/pubmed/10488343>

925 28. Bei Y, Hogan J, Berkowitz LA, Soto M, Rocheleau CE, Pang KM, et al. SRC-1 and Wnt

- 926 signaling act together to specify endoderm and to control cleavage orientation in  
927 early *C. elegans* embryos. *Dev Cell*. 2002;3: 113–25. Available:  
928 <http://www.ncbi.nlm.nih.gov/pubmed/12110172>
- 929 29. Thorpe CJ, Schlesinger A, Carter JC, Bowerman B. Wnt signaling polarizes an early *C.*  
930 *elegans* blastomere to distinguish endoderm from mesoderm. *Cell*. 1997;90: 695–  
931 705. Available: <http://www.ncbi.nlm.nih.gov/pubmed/9288749>
- 932 30. Nakamura K, Kim S, Ishidate T, Bei Y, Pang K, Shirayama M, et al. Wnt signaling drives  
933 WRM-1/beta-catenin asymmetries in early *C. elegans* embryos. *Genes Dev*. Cold  
934 Spring Harbor Laboratory Press; 2005;19: 1749–54. doi:10.1101/gad.1323705
- 935 31. Rocheleau CE, Yasuda J, Shin TH, Lin R, Sawa H, Okano H, et al. WRM-1 Activates the  
936 LIT-1 Protein Kinase to Transduce Anterior/Posterior Polarity Signals in *C. elegans*.  
937 *Cell*. Cell Press; 1999;97: 717–726. doi:10.1016/S0092-8674(00)80784-9
- 938 32. Owrighi M, Broitman-Maduro G, Luu T, Roberson H, Maduro MF. Roles of the Wnt  
939 effector POP-1/TCF in the *C. elegans* endomesoderm specification gene network. *Dev*  
940 *Biol*. NIH Public Access; 2010;340: 209–21. doi:10.1016/j.ydbio.2009.09.042
- 941 33. Huang S, Shetty P, Robertson SM, Lin R. Binary cell fate specification during *C. elegans*  
942 embryogenesis driven by reiterated reciprocal asymmetry of TCF POP-1 and its  
943 coactivator -catenin SYS-1. *Development*. 2007;134: 2685–2695.  
944 doi:10.1242/dev.008268
- 945 34. Maduro MF, Lin R, Rothman JH. Dynamics of a Developmental Switch: Recursive  
946 Intracellular and Intranuclear Redistribution of *Caenorhabditis elegans* POP-1  
947 Parallels Wnt-Inhibited Transcriptional Repression. *Dev Biol*. Academic Press;



- 948 2002;248: 128–142. doi:10.1006/DBIO.2002.0721
- 949 35. Phillips BT, Kidd AR, King R, Hardin J, Kimble J. Reciprocal asymmetry of SYS-1/beta-  
950 catenin and POP-1/TCF controls asymmetric divisions in *Caenorhabditis elegans*. Proc  
951 Natl Acad Sci. 2007;104: 3231–3236. doi:10.1073/pnas.0611507104
- 952 36. Maduro MF, Kasmir JJ, Zhu J, Rothman JH. The Wnt effector POP-1 and the PAL-  
953 1/Caudal homeoprotein collaborate with SKN-1 to activate *C. elegans* endoderm  
954 development. Dev Biol. 2005;285: 510–523. doi:10.1016/j.ydbio.2005.06.022
- 955 37. Shetty P, Lo M-C, Robertson SM, Lin R. *C. elegans* TCF protein, POP-1, converts from  
956 repressor to activator as a result of Wnt-induced lowering of nuclear levels. Dev Biol.  
957 2005;285: 584–592. doi:10.1016/j.ydbio.2005.07.008
- 958 38. Lin KT-H, Broitman-Maduro G, Hung WWK, Cervantes S, Maduro MF. Knockdown of  
959 SKN-1 and the Wnt effector TCF/POP-1 reveals differences in endomesoderm  
960 specification in *C. briggsae* as compared with *C. elegans*. Dev Biol. 2009;325: 296–  
961 306. doi:10.1016/j.ydbio.2008.10.001
- 962 39. Félix M-A, Braendle C. The natural history of *Caenorhabditis elegans*. Curr Biol.  
963 Elsevier; 2010;20: R965-9. doi:10.1016/j.cub.2010.09.050
- 964 40. Andersen EC, Gerke JP, Shapiro JA, Crissman JR, Ghosh R, Bloom JS, et al.  
965 Chromosome-scale selective sweeps shape *Caenorhabditis elegans* genomic diversity.  
966 Nat Genet. NIH Public Access; 2012;44: 285–90. doi:10.1038/ng.1050
- 967 41. Cook DE, Zdraljevic S, Roberts JP, Andersen EC. CeNDR, the *Caenorhabditis elegans*  
968 natural diversity resource. Nucleic Acids Res. 2017;45: D650–D657.  
969 doi:10.1093/nar/gkw893

- 970 42. Brenner S. The genetics of *Caenorhabditis elegans*. *Genetics*. 1974;77: 71–94.  
971 Available: <http://www.ncbi.nlm.nih.gov/pubmed/4366476>
- 972 43. Kamath RS, Ahringer J. Genome-wide RNAi screening in *Caenorhabditis elegans*.  
973 *Methods*. Academic Press; 2003;30: 313–321. doi:10.1016/S1046-2023(03)00050-1
- 974 44. Rual J-F, Ceron J, Koreth J, Hao T, Nicot A-S, Hirozane-Kishikawa T, et al. Toward  
975 Improving *Caenorhabditis elegans* Phenome Mapping With an ORFeome-Based RNAi  
976 Library. *Genome Res*. 2004;14: 2162–2168. doi:10.1101/gr.2505604
- 977 45. Kamath RS, Fraser AG, Dong Y, Poulin G, Durbin R, Gotta M, et al. Systematic  
978 functional analysis of the *Caenorhabditis elegans* genome using RNAi. *Nature*. Nature  
979 Publishing Group; 2003;421: 231–237. doi:10.1038/nature01278
- 980 46. Sommermann EM, Strohmaier KR, Maduro MF, Rothman JH. Endoderm development  
981 in *Caenorhabditis elegans*: The synergistic action of ELT-2 and -7 mediates the  
982 specification→differentiation transition. *Dev Biol*. 2010;347: 154–166.  
983 doi:10.1016/j.ydbio.2010.08.020
- 984 47. Clokey G V, Jacobson LA. The autofluorescent “lipofuscin granules” in the intestinal  
985 cells of *Caenorhabditis elegans* are secondary lysosomes. *Mech Ageing Dev*. 1986;35:  
986 79–94. Available: <http://www.ncbi.nlm.nih.gov/pubmed/3736133>
- 987 48. Hermann GJ, Schroeder LK, Hieb CA, Kershner AM, Rabbitts BM, Fonarev P, et al.  
988 Genetic Analysis of Lysosomal Trafficking in *Caenorhabditis elegans*. *Mol Biol Cell*.  
989 2005;16: 3273–3288. doi:10.1091/mbc.E05
- 990 49. Kang HM, Zaitlen NA, Wade CM, Kirby A, Heckerman D, Daly MJ, et al. Efficient  
991 Control of Population Structure in Model Organism Association Mapping. *Genetics*.

- 992 2008;178: 1709–1723. doi:10.1534/genetics.107.080101
- 993 50. Millstein J, Volfson D. Computationally efficient permutation-based confidence  
994 interval estimation for tail-area FDR. *Front Genet. Frontiers Media SA*; 2013;4: 179.  
995 doi:10.3389/fgene.2013.00179
- 996 51. Hansen E, Kerr KF. A Comparison of Two Classes of Methods for Estimating False  
997 Discovery Rates in Microarray Studies. *Scientifica (Cairo)*. 2012;2012: 1–9.  
998 doi:10.6064/2012/519394
- 999 52. Elshire RJ, Glaubitz JC, Sun Q, Poland JA, Kawamoto K, Buckler ES, et al. A Robust,  
1000 Simple Genotyping-by-Sequencing (GBS) Approach for High Diversity Species. Orban  
1001 L, editor. *PLoS One. Public Library of Science*; 2011;6: e19379.  
1002 doi:10.1371/journal.pone.0019379
- 1003 53. Bradbury PJ, Zhang Z, Kroon DE, Casstevens TM, Ramdoss Y, Buckler ES. TASSEL:  
1004 software for association mapping of complex traits in diverse samples.  
1005 *Bioinformatics*. 2007;23: 2633–2635. doi:10.1093/bioinformatics/btm308
- 1006 54. Danecek P, Auton A, Abecasis G, Albers CA, Banks E, DePristo MA, et al. The variant  
1007 call format and VCFtools. *Bioinformatics. Oxford University Press*; 2011;27: 2156–8.  
1008 doi:10.1093/bioinformatics/btr330
- 1009 55. Broman KW, Sen S. *A Guide to QTL Mapping with R/qtl*. New York, NY: Springer New  
1010 York; 2009; 1–20. doi:10.1007/978-0-387-92125-9
- 1011 56. Broman KW, Wu H, Sen S, Churchill GA. R/qtl: QTL mapping in experimental crosses.  
1012 *Bioinformatics*. 2003;19: 889–90. Available:  
1013 <http://www.ncbi.nlm.nih.gov/pubmed/12724300>

- 1014 57. Zhao Z, Boyle TJ, Bao Z, Murray JI, Mericle B, Waterston RH. Comparative analysis of  
1015 embryonic cell lineage between *Caenorhabditis briggsae* and *Caenorhabditis elegans*.  
1016 Dev Biol. NIH Public Access; 2008;314: 93–9. doi:10.1016/j.ydbio.2007.11.015
- 1017 58. Cutter AD. Divergence Times in *Caenorhabditis* and *Drosophila* Inferred from Direct  
1018 Estimates of the Neutral Mutation Rate. Mol Biol Evol. Oxford University Press;  
1019 2008;25: 778–786. doi:10.1093/molbev/msn024
- 1020 59. Sterken MG, Snoek LB, Kammenga JE, Andersen EC. The laboratory domestication of  
1021 *Caenorhabditis elegans*. Trends Genet. NIH Public Access; 2015;31: 224–31.  
1022 doi:10.1016/j.tig.2015.02.009
- 1023 60. Paaby AB, White AG, Riccardi DD, Gunsalus KC, Piano F, Rockman M V. Wild worm  
1024 embryogenesis harbors ubiquitous polygenic modifier variation. Elife. eLife Sciences  
1025 Publications Limited; 2015;4: e09178. doi:10.7554/eLife.09178
- 1026 61. Echeverri CJ, Beachy PA, Baum B, Boutros M, Buchholz F, Chanda SK, et al. Minimizing  
1027 the risk of reporting false positives in large-scale RNAi screens. Nat Methods. 2006;3:  
1028 777–779. doi:10.1038/nmeth1006-777
- 1029 62. Zhuang JJ, Hunter CP. RNA interference in *Caenorhabditis elegans*: Uptake,  
1030 mechanism, and regulation. Parasitology. 2012;139: 560–573.  
1031 doi:10.1017/S0031182011001788
- 1032 63. Raj A, Rifkin SA, Andersen E, van Oudenaarden A. Variability in gene expression  
1033 underlies incomplete penetrance. Nature. Nature Publishing Group; 2010;463: 913–  
1034 918. doi:10.1038/nature08781
- 1035 64. Zhu J, Hill RJ, Heid PJ, Fukuyama M, Sugimoto A, Priess JR, et al. end-1 encodes an

- 1036           apparent GATA factor that specifies the endoderm precursor in *Caenorhabditis*  
1037           *elegans* embryos. *Genes Dev.* Cold Spring Harbor Laboratory Press; 1997;11: 2883–  
1038           96. Available: <http://www.ncbi.nlm.nih.gov/pubmed/9353257>
- 1039   65.   Gleason JE, Korswagen HC, Eisenmann DM. Activation of Wnt signaling bypasses the  
1040           requirement for RTK/Ras signaling during *C. elegans* vulval induction. *Genes Dev.* Cold  
1041           Spring Harbor Laboratory Press; 2002;16: 1281–90. doi:10.1101/gad.981602
- 1042   66.   Wang J, Zaitlen NA, Wade CM, Kirby A, Heckerman D, Daly MJ, et al. An estimator for  
1043           pairwise relatedness using molecular markers. *Genetics.* *Genetics*; 2002;160: 1203–  
1044           15. doi:10.1534/genetics.167.1.531
- 1045   67.   Rieseberg LH, Widmer A, Arntz AM, Burke B. The genetic architecture necessary for  
1046           transgressive segregation is common in both natural and domesticated populations.  
1047           *Philos Trans R Soc B Biol Sci.* 2003;358: 1141–1147. doi:10.1098/rstb.2003.1283
- 1048   68.   Ruf V, Holzem C, Peyman T, Walz G, Blackwell TK, Neumann-Haefelin E. TORC2  
1049           signaling antagonizes SKN-1 to induce *C. elegans* mesendodermal embryonic  
1050           development. *Dev Biol.* Academic Press; 2013;384: 214–227.  
1051           doi:10.1016/J.YDBIO.2013.08.011
- 1052   69.   Witze ES, Field ED, Hunt DF, Rothman JH. *C. elegans* pur alpha, an activator of end-1,  
1053           synergizes with the Wnt pathway to specify endoderm. *Dev Biol.* 2009;327: 12–23.  
1054           doi:10.1016/j.ydbio.2008.11.015
- 1055   70.   Walston T, Tuskey C, Edgar L, Hawkins N, Ellis G, Bowerman B, et al. Multiple Wnt  
1056           Signaling Pathways Converge to Orient the Mitotic Spindle in Early *C. elegans*  
1057           Embryos. *Dev Cell.* Cell Press; 2004;7: 831–841. doi:10.1016/J.DEVCEL.2004.10.008

- 1058 71. Tatebe H, Shiozaki K. Evolutionary Conservation of the Components in the TOR  
1059 Signaling Pathways. *Biomolecules*. 2017;7: 77. doi:10.3390/biom7040077
- 1060 72. Adoutte A, Philippe H. The major lines of metazoan evolution: summary of traditional  
1061 evidence and lessons from ribosomal RNA sequence analysis. *EXS*. 1993;63: 1–30.  
1062 Available: <http://www.ncbi.nlm.nih.gov/pubmed/8422536>
- 1063 73. Kalinka AT, Varga KM, Gerrard DT, Preibisch S, Corcoran DL, Jarrells J, et al. Gene  
1064 expression divergence recapitulates the developmental hourglass model. *Nature*.  
1065 Nature Publishing Group; 2010;468: 811–814. doi:10.1038/nature09634
- 1066 74. Raff RA. *The shape of life : genes, development, and the evolution of animal form*.  
1067 University of Chicago Press; 1996.
- 1068 75. Domazet-Lošo T, Tautz D. A phylogenetically based transcriptome age index mirrors  
1069 ontogenetic divergence patterns. *Nature*. Nature Publishing Group; 2010;468: 815–  
1070 818. doi:10.1038/nature09632
- 1071 76. Coroian C, Broitman-Maduro G, Maduro MF. Med-type GATA factors and the  
1072 evolution of mesendoderm specification in nematodes. *Dev Biol*. 2006;289: 444–455.  
1073 doi:10.1016/j.ydbio.2005.10.024
- 1074 77. Maduro MF, Hill RJ, Heid PJ, Newman-Smith ED, Zhu J, Priess JR, et al. Genetic  
1075 redundancy in endoderm specification within the genus *Caenorhabditis*. *Dev Biol*.  
1076 2005;284: 509–522. doi:10.1016/j.ydbio.2005.05.016
- 1077 78. Mensch J, Serra F, Lavagnino NJ, Dopazo H, Hasson E. Positive Selection in  
1078 Nucleoporins Challenges Constraints on Early Expressed Genes in *Drosophila*  
1079 Development. *Genome Biol Evol*. 2013;5: 2231–2241. doi:10.1093/gbe/evt156

- 1080 79. Davis GK, Patel NH. Short, Long, and Beyond: Molecular and Embryological  
1081 Approaches to Insect Segmentation. *Annu Rev Entomol. Annual Reviews* 4139 El  
1082 Camino Way, P.O. Box 10139, Palo Alto, CA 94303-0139, USA ; 2002;47: 669–699.  
1083 doi:10.1146/annurev.ento.47.091201.145251
- 1084 80. Lynch JA, El-Sherif E, Brown SJ. Comparisons of the embryonic development of  
1085 *Drosophila*, *Nasonia*, and *Tribolium*. *Wiley Interdiscip Rev Dev Biol. John Wiley &*  
1086 *Sons, Ltd* (10.1111); 2012;1: 16–39. doi:10.1002/wdev.3
- 1087 81. Atallah J, Lott SE. Evolution of maternal and zygotic mRNA complements in the early  
1088 *Drosophila* embryo. Dyer KA, editor. *PLOS Genet.* 2018;14: e1007838.  
1089 doi:10.1371/journal.pgen.1007838
- 1090 82. Vu V, Verster AJ, Schertzberg M, Chuluunbaatar T, Spensley M, Pajkic D, et al. Natural  
1091 Variation in Gene Expression Modulates the Severity of Mutant Phenotypes. *Cell.*  
1092 2015;162: 391–402. doi:10.1016/j.cell.2015.06.037
- 1093 83. Moore JH, Williams SM. Epistasis and Its Implications for Personal Genetics. *Am J*  
1094 *Hum Genet. Cell Press*; 2009;85: 309–320. doi:10.1016/J.AJHG.2009.08.006
- 1095 84. Page GP, George V, Go RC, Page PZ, Allison DB. “Are We There Yet?”: Deciding When  
1096 One Has Demonstrated Specific Genetic Causation in Complex Diseases and  
1097 Quantitative Traits. *Am J Hum Genet.* 2003;73: 711–719. doi:10.1086/378900
- 1098 85. Mackay TFC. Epistasis and quantitative traits: using model organisms to study gene-  
1099 gene interactions. *Nat Rev Genet. NIH Public Access*; 2014;15: 22–33.  
1100 doi:10.1038/nrg3627
- 1101 86. Volis S, Shulgina I, Zaretsky M, Koren O. Epistasis in natural populations of a

- 1102           predominantly selfing plant. *Heredity* (Edinb). Nature Publishing Group; 2011;106:  
1103           300–9. doi:10.1038/hdy.2010.79
- 1104   87.   Félix M-A. Cryptic Quantitative Evolution of the Vulva Intercellular Signaling Network  
1105           in *Caenorhabditis*. *Curr Biol*. 2007;17: 103–114. doi:10.1016/j.cub.2006.12.024
- 1106   88.   Barkoulas M, van Zon JS, Milloz J, van Oudenaarden A, Félix M-A. Robustness and  
1107           Epistasis in the *C. elegans* Vulval Signaling Network Revealed by Pathway Dosage  
1108           Modulation. *Dev Cell*. Cell Press; 2013;24: 64–75. doi:10.1016/J.DEVCEL.2012.12.001
- 1109   89.   Duveau F, Félix M-A. Role of Pleiotropy in the Evolution of a Cryptic Developmental  
1110           Variation in *Caenorhabditis elegans*. Noor MAF, editor. *PLoS Biol*. Public Library of  
1111           Science; 2012;10: e1001230. doi:10.1371/journal.pbio.1001230
- 1112   90.   Johnson NA, Porter AH. Evolution of branched regulatory genetic pathways:  
1113           directional selection on pleiotropic loci accelerates developmental system drift.  
1114           *Genetica*. Springer Netherlands; 2006;129: 57–70. doi:10.1007/s10709-006-0033-2
- 1115   91.   Phillips PC. Epistasis--the essential role of gene interactions in the structure and  
1116           evolution of genetic systems. *Nat Rev Genet*. NIH Public Access; 2008;9: 855–67.  
1117           doi:10.1038/nrg2452
- 1118   92.   Wagner GP, Zhang J. The pleiotropic structure of the genotype–phenotype map: the  
1119           evolvability of complex organisms. *Nat Rev Genet*. Nature Publishing Group; 2011;12:  
1120           204–213. doi:10.1038/nrg2949
- 1121   93.   Shafer B, Onishi K, Lo C, Colakoglu G, Zou Y. Vangl2 Promotes Wnt/Planar Cell  
1122           Polarity-like Signaling by Antagonizing Dvl1-Mediated Feedback Inhibition in Growth  
1123           Cone Guidance. *Dev Cell*. Cell Press; 2011;20: 177–191.



- 1124 doi:10.1016/J.DEVCEL.2011.01.002
- 1125 94. Zheng C, Diaz-Cuadros M, Chalfie M. Dishevelled attenuates the repelling activity of  
1126 Wnt signaling during neurite outgrowth in *Caenorhabditis elegans*. Proc Natl Acad Sci  
1127 U S A. National Academy of Sciences; 2015;112: 13243–8.  
1128 doi:10.1073/pnas.1518686112
- 1129 95. Rivera-Pomar R, Jäckle H. From gradients to stripes in *Drosophila* embryogenesis:  
1130 filling in the gaps. Trends Genet. Elsevier Current Trends; 1996;12: 478–483.  
1131 doi:10.1016/0168-9525(96)10044-5
- 1132 96. Maduro MF, Broitman-Maduro G, Choi H, Carranza F, Wu AC-Y, Rifkin SA. MED GATA  
1133 factors promote robust development of the *C. elegans* endoderm. Dev Biol. Academic  
1134 Press; 2015;404: 66–79. doi:10.1016/J.YDBIO.2015.04.025
- 1135 97. Choi H, Broitman-Maduro G, Maduro MF. Partially compromised specification causes  
1136 stochastic effects on gut development in *C. elegans*. Dev Biol. Academic Press;  
1137 2017;427: 49–60. doi:10.1016/J.YDBIO.2017.05.007
- 1138 98. Maduro MF. Developmental robustness in the *Caenorhabditis elegans* embryo. Mol  
1139 Reprod Dev. 2015;82: 918–931. doi:10.1002/mrd.22582
- 1140 99. Zhan T, Rindtorff N, Boutros M. Wnt signaling in cancer. Oncogene. Nature Publishing  
1141 Group; 2017;36: 1461–1473. doi:10.1038/onc.2016.304
- 1142 100. Jenkins ZA, van Kogelenberg M, Morgan T, Jeffs A, Fukuzawa R, Pearl E, et al.  
1143 Germline mutations in WTX cause a sclerosing skeletal dysplasia but do not  
1144 predispose to tumorigenesis. Nat Genet. 2009;41: 95–100. doi:10.1038/ng.270
- 1145 101. Baron R, Gori F. Targeting WNT signaling in the treatment of osteoporosis. Curr Opin

- 1146 Pharmacol. Elsevier; 2018;40: 134–141. doi:10.1016/J.COPH.2018.04.011
- 1147 102. Chen N, Wang J. Wnt/ $\beta$ -Catenin Signaling and Obesity. *Front Physiol.* 2018;9: 792.  
1148 doi:10.3389/fphys.2018.00792
- 1149 103. Schinner S. Wnt-signalling and the Metabolic Syndrome. *Horm Metab Res.* 2009;41:  
1150 159–163. doi:10.1055/s-0028-1119408
- 1151 104. Gibson G, Dworkin I. Uncovering cryptic genetic variation. *Nat Rev Genet. Nature*  
1152 *Publishing Group*; 2004;5: 681–690. doi:10.1038/nrg1426
- 1153 105. Frankel N, Davis GK, Vargas D, Wang S, Payre F, Stern DL. Phenotypic robustness  
1154 conferred by apparently redundant transcriptional enhancers. *Nature.* 2010;466:  
1155 490–493. doi:10.1038/nature09158
- 1156 106. Mohun T. Muscle differentiation. *Curr Opin Cell Biol.* 1992;4: 923–8. Available:  
1157 <http://www.ncbi.nlm.nih.gov/pubmed/1485959>
- 1158 107. Imai Y, Gates MA, Melby AE, Kimelman D, Schier AF, Talbot WS. The homeobox genes  
1159 *vox* and *vent* are redundant repressors of dorsal fates in zebrafish. *Development.*  
1160 2001;128: 2407–20. Available: <http://www.ncbi.nlm.nih.gov/pubmed/11493559>
- 1161 108. Manley NR, Capecchi MR. Hox Group 3 Paralogous Genes Act Synergistically in the  
1162 Formation of Somitic and Neural Crest-Derived Structures. *Dev Biol. Academic Press*;  
1163 1997;192: 274–288. doi:10.1006/DBIO.1997.8765
- 1164 109. Nam J, Nei M. Evolutionary change of the numbers of homeobox genes in bilateral  
1165 animals. *Mol Biol Evol. NIH Public Access*; 2005;22: 2386–94.  
1166 doi:10.1093/molbev/msi229

- 1167 110. Yoon CH, Chang C, Hopper NA, Lesa GM, Sternberg PW. Requirements of multiple  
1168 domains of SLI-1, a *Caenorhabditis elegans* homologue of c-Cbl, and an inhibitory  
1169 tyrosine in LET-23 in regulating vulval differentiation. *Mol Biol Cell*. American Society  
1170 for Cell Biology; 2000;11: 4019–31. Available:  
1171 <http://www.ncbi.nlm.nih.gov/pubmed/11071924>
- 1172 111. Braendle C, Félix M-A. Plasticity and Errors of a Robust Developmental System in  
1173 Different Environments. *Dev Cell*. 2008;15: 714–724.  
1174 [doi:10.1016/j.devcel.2008.09.011](https://doi.org/10.1016/j.devcel.2008.09.011)
- 1175 112. Grimbert S, Vargas Velazquez AM, Braendle C. Physiological Starvation Promotes  
1176 *Caenorhabditis elegans* Vulval Induction. *G3 (Bethesda)*. Genetics Society of America;  
1177 2018;8: 3069–3081. [doi:10.1534/g3.118.200449](https://doi.org/10.1534/g3.118.200449)
- 1178 113. Zheng M, Messerschmidt D, Jungblut B, Sommer RJ. Conservation and diversification  
1179 of Wnt signaling function during the evolution of nematode vulva development. *Nat*  
1180 *Genet*. 2005;37: 300–304. [doi:10.1038/ng1512](https://doi.org/10.1038/ng1512)
- 1181 114. Wang X, Sommer RJ. Antagonism of LIN-17/Frizzled and LIN-18/Ryk in Nematode  
1182 Vulva Induction Reveals Evolutionary Alterations in Core Developmental Pathways.  
1183 Sternberg PW, editor. *PLoS Biol*. 2011;9: e1001110.  
1184 [doi:10.1371/journal.pbio.1001110](https://doi.org/10.1371/journal.pbio.1001110)
- 1185 115. Zalts H, Yanai I. Developmental constraints shape the evolution of the nematode mid-  
1186 developmental transition. *Nat Ecol Evol*. Nature Publishing Group; 2017;1: 0113.  
1187 [doi:10.1038/s41559-017-0113](https://doi.org/10.1038/s41559-017-0113)
- 1188

1189 **Supplementary figures**

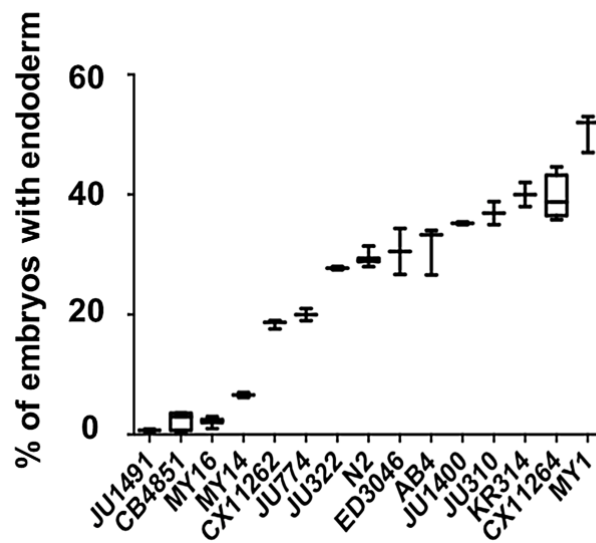

1190

1191 **Supplemental Fig. 1: High reproducibility of *skn-1*(RNAi) phenotypes in various *C. elegans* isotypes.**

1192 *A minimum of two replicates were obtained, with >500 embryos per replicate. Box-plot represents median*  
1193 *with range bars showing upper and lower quartiles.*

1194

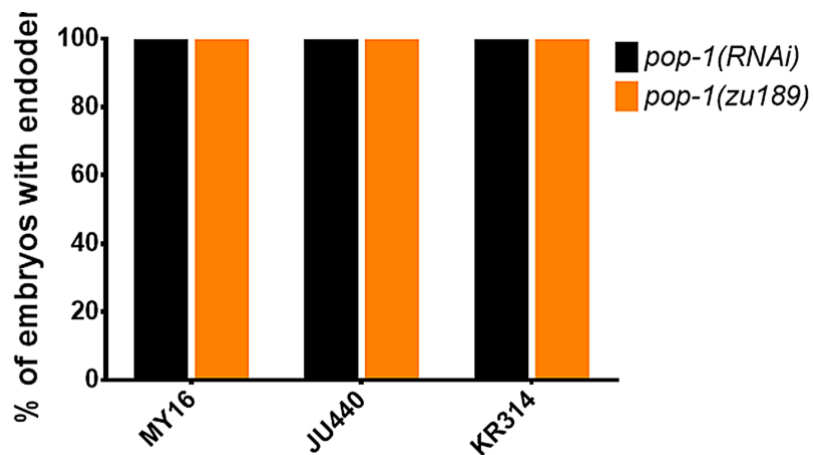

1195

1196 **Supplemental Fig. 2: The requirement for POP-1 in endoderm formation does not vary in three**  
1197 **introgressed strains.**

1198 *Strains are shown on the x-axis and fraction of arrested embryos with endoderm are shown on the y-axis.*  
1199 *Four introgressed lines were studied for each mutant strain. >200 embryos were scored per experiment.*

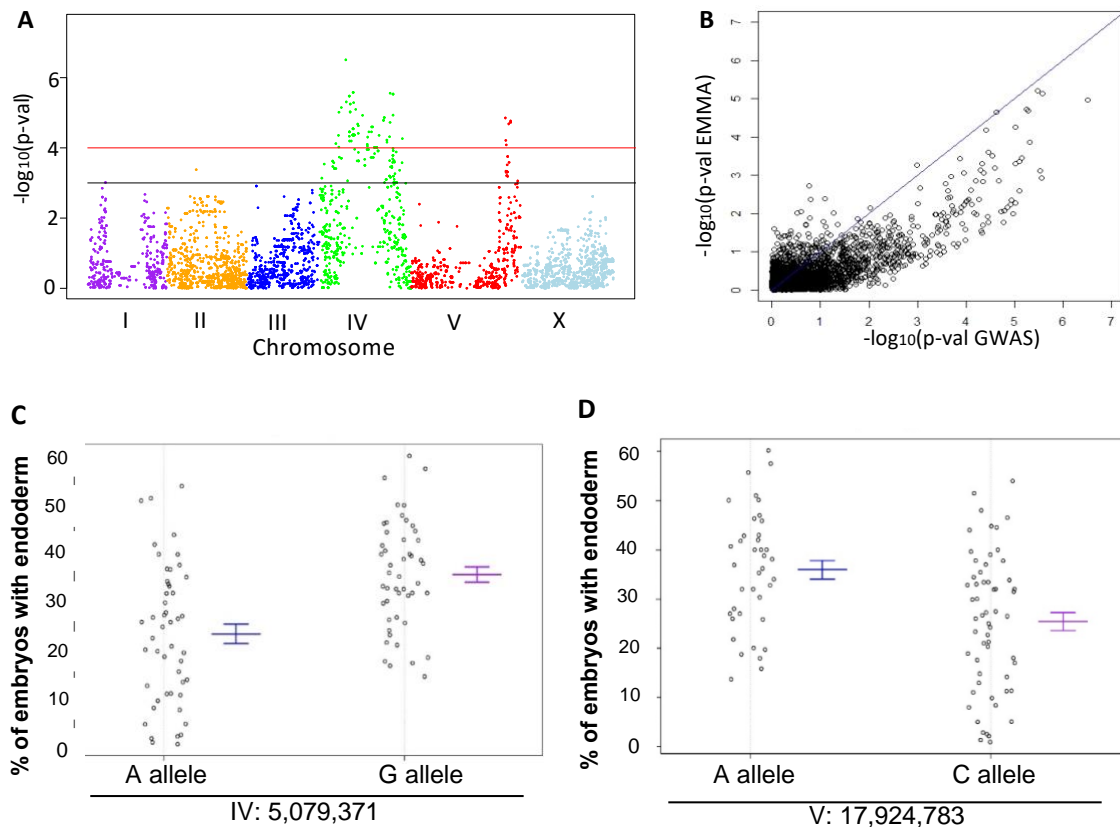

1200

1201 **Supplemental Fig. 3: linear model GWAS of *skn-1* embryonic phenotype highly correlates with the mixed-**  
 1202 **model analysis.**

1203 (A) Manhattan plot of *skn-1*(RNAi) GWAS. Red line represents 1.5% FDR (obtained from 10,000 permuted  
 1204 results) and black line represents 3.0% FDR. The chromosomes are color-coded. The y axis is the  $-\log_{10}$  of p-  
 1205 value. (B) Correlation between *skn-1*(RNAi) GWAS and EMMA (see Fig. 5A). y-axis is the  $-\log_{10}$  of the p-  
 1206 values from EMMA, x-axis is  $-\log_{10}$  of the p-values from GWAS. A modest linear relationship is found  
 1207 (Spearman correlation coefficient = 0.43) as shown by the blue line. (C) Effect plot of the top SNP revealed  
 1208 by *skn-1*(RNAi) EMMA (see Fig. 5A). (D) Effect plot of the top SNP on Chromosome V revealed by *skn-1*(RNAi)  
 1209 GWAS. The variant position and genotype are shown on the x-axis, while the phenotype of strains carrying  
 1210 the alleles after *skn-1*(RNAi) treatment is shown on the y-axis. Confidence intervals for the average  
 1211 phenotype in each genotype group are shown.

1212

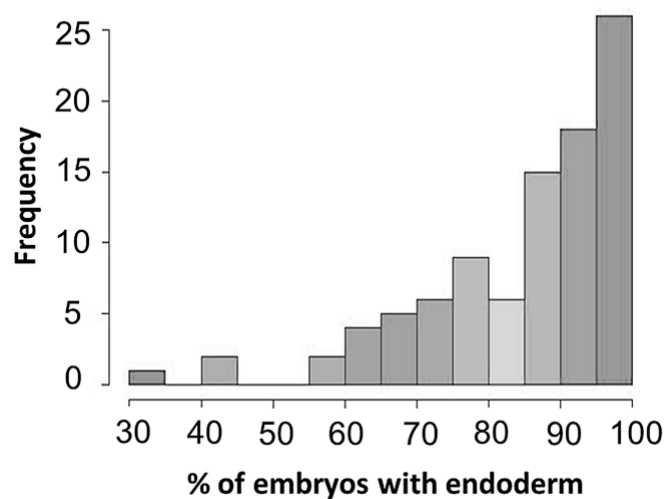

1213

1214 **Supplemental Fig. 4: Histogram of *mom-2*(RNAi) phenotype among the 94 wild isolates.**

1215 A beta-distribution is observed (skewed to the right). Shapiro-Wilk normality test ( $W=0.8682$ ,  $p$ -  
1216 value= $1.207 \times 10^{-7}$ ).

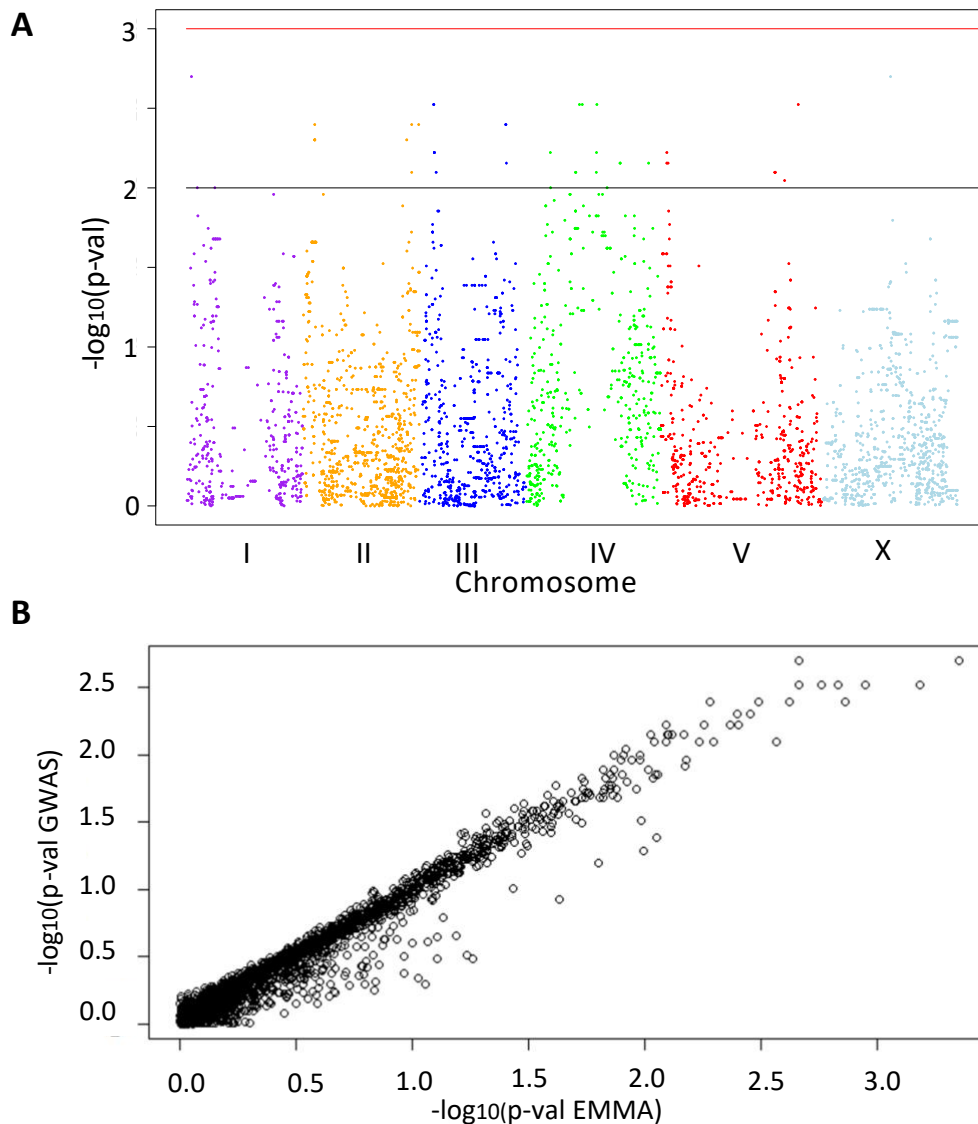

1217

1218 **Supplemental Fig. 5: GWAS of *mom-2* embryonic phenotype is highly correlated with the mixed-model**  
1219 **analysis.**

1220 (A) Manhattan plot of *mom-2(RNAi)* GWAS (permutation-adjusted p-values). Black line represents p-  
1221 value<0.01, while red line represents p-value<0.001. Genomic regions are shown on the x-axis. The  
1222 chromosomes are color-coded. The y axis is the  $-\log_{10}$  of p-value in the linear model. (B) Correlation  
1223 between *mom-2(RNAi)* GWAS and EMMA. The y-axis represents the  $-\log_{10}$  of the p-values from the GWAS  
1224 approach, while the x-axis represents  $-\log_{10}$  of the p-values from the EMMA approach. A strong linear  
1225 relationship is found (Pearson's correlation  $R = 0.95$ , p-value  $< 2.2e-16$ ).

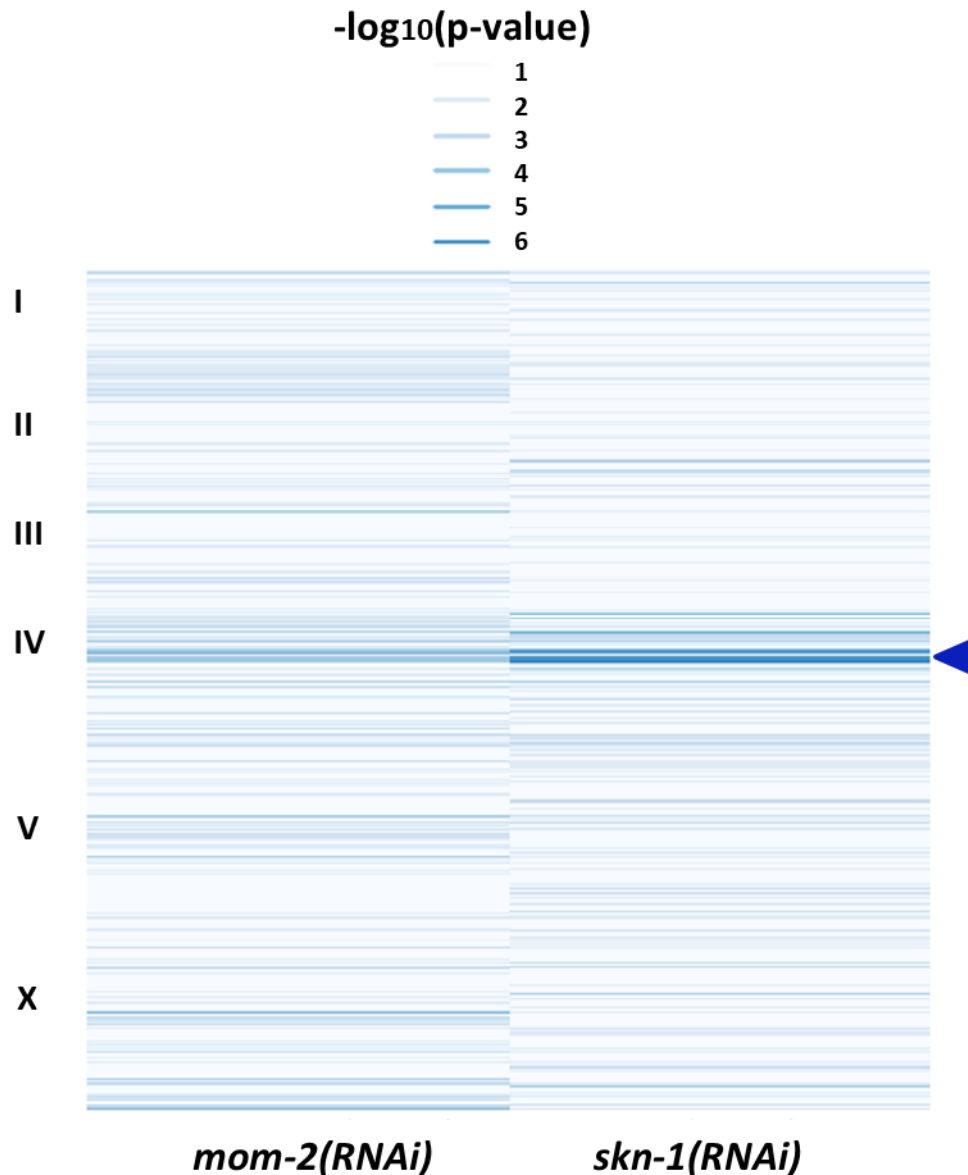

1226

1227 **Supplemental Fig. 6: Comparison of EMMA p-values for both *mom-2* and *skn-1* RNAi phenotypes.**

1228 Heatmap of p-values for *mom-2*(RNAi) (left) and *skn-1*(RNAi) (right) as calculated in the EMMA analyses  
1229 (see Fig. 5A, B). Strength of association between genotype and endoderm formation phenotypes is  
1230 represented as  $-\log_{10}(p\text{-value})$ , here depicted as a heatmap (lighter colors – weaker association, darker  
1231 colors – stronger association). An overlap (indicated by arrow head) is found in a small region of  
1232 chromosome IV, but no further correlations are observed.



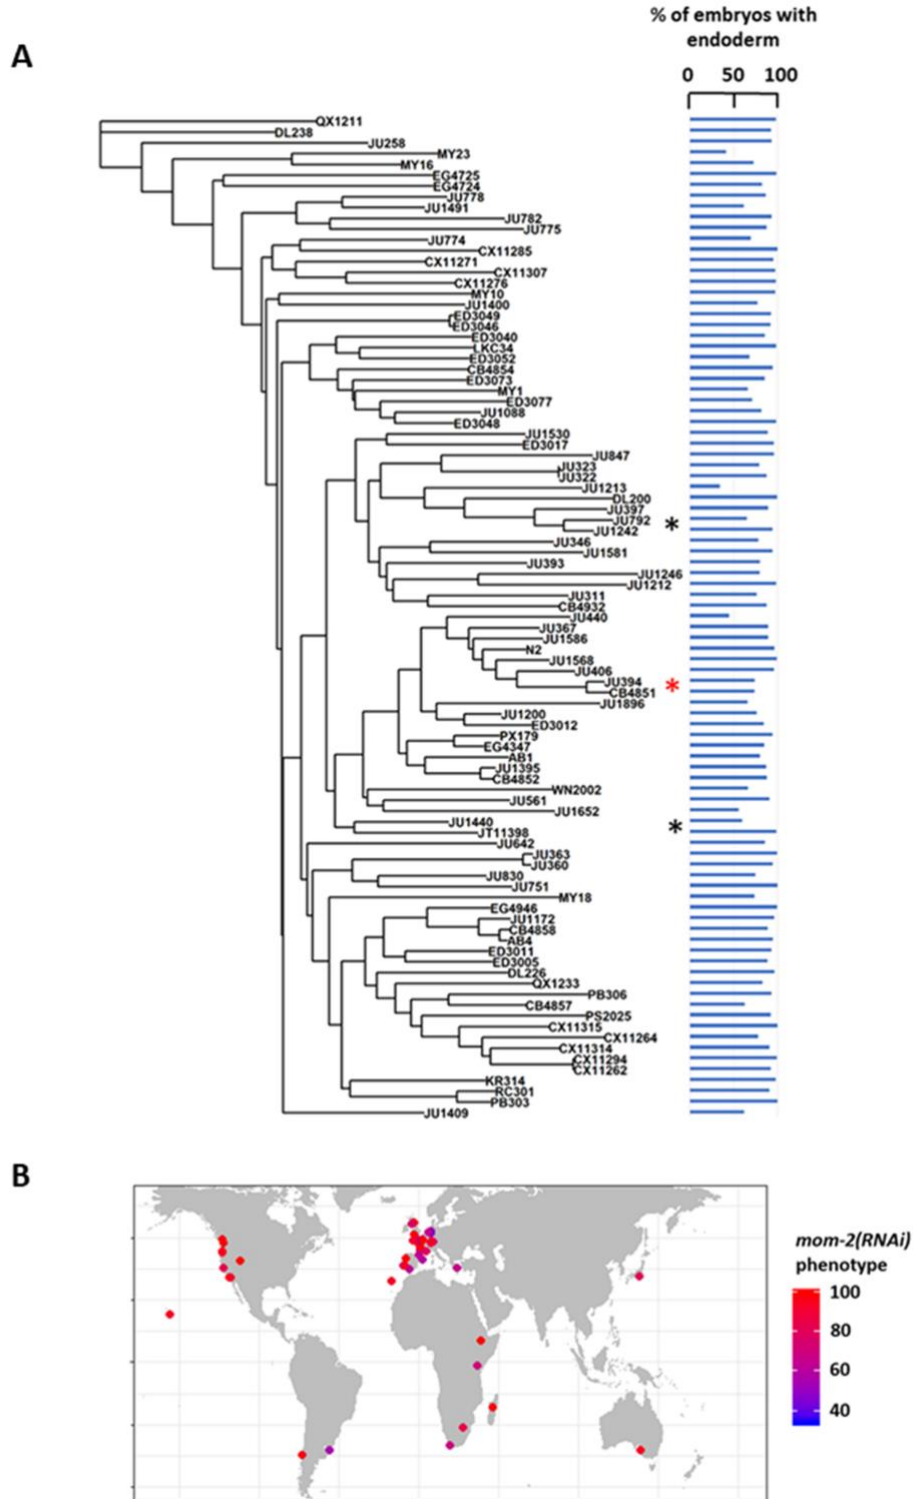

1233

1234 **Supplemental Fig. 7: MOM-2 requirement does not correlate with genotypic relatedness or geographical**  
1235 **location.**

1236 (A) *mom-2* (RNAi) phenotype of 94 isolates arranged with respect to the neighbor-joining tree constructed  
1237 using 4,690 SNPs and pseudo-rooted to QX1211. Red asterisk indicates an example of closely related strains  
1238 (JU394 and CB4851) with similar phenotypes, while black asterisks indicate examples sister strains (JU792  
1239 and JU1242; JU1440 and JT11398) with distinct phenotypes. (B) Worldwide distribution of *mom-2*(RNAi)  
1240 phenotype across 94 isolates. Each circle represents a single isolate.

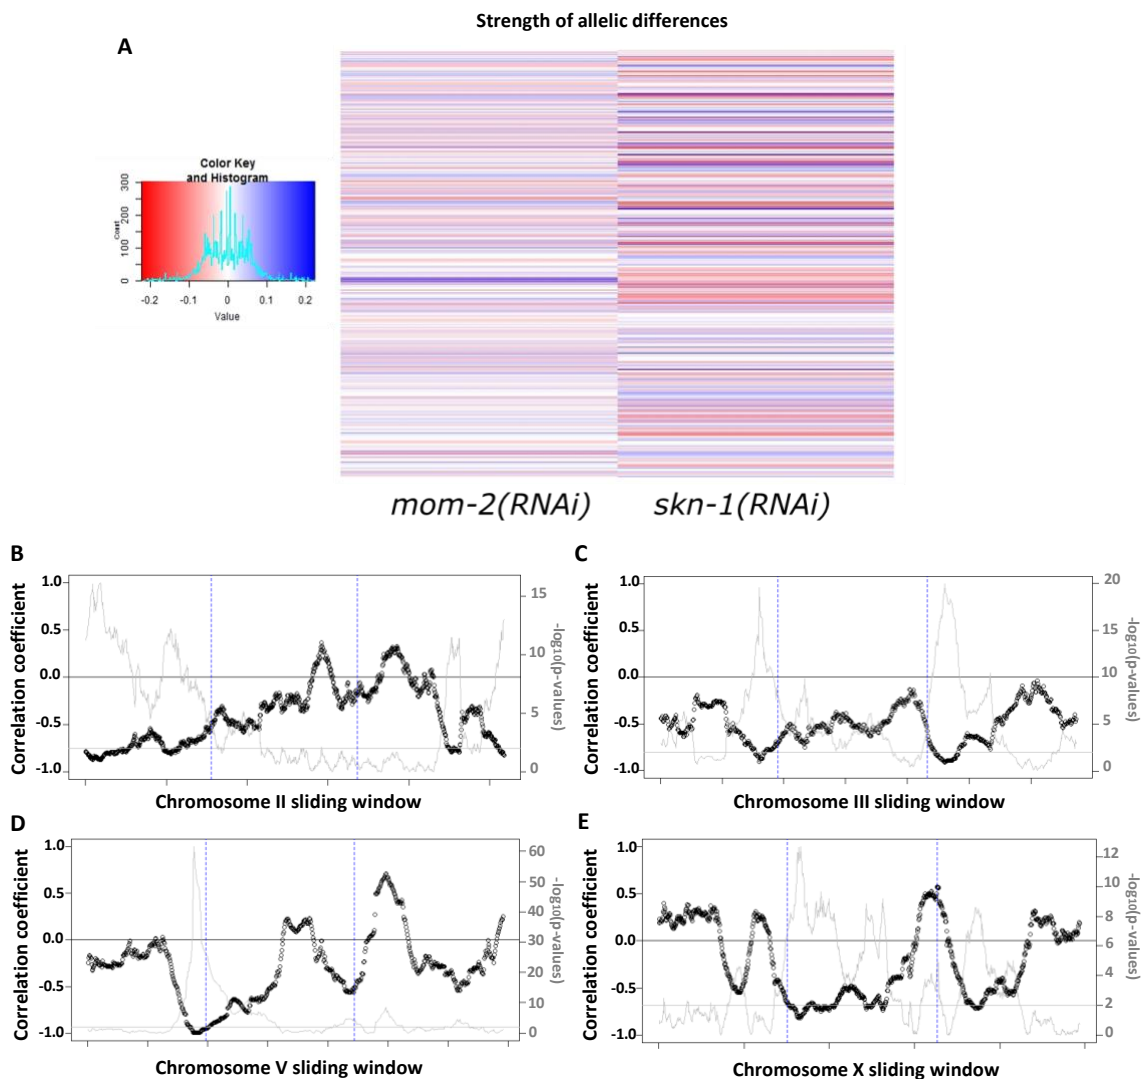

1241

1242 **Supplemental Fig. 8: Negative correlation of *skn-1(RNAi)* and *mom-2(RNAi)* allelic differences.**

1243 (A) Heat map of allelic differences per SNP for *skn-1(RNAi)* and *mom-2(RNAi)*, as calculated by the  
 1244 phenotypic median differences per allele at each SNP. Each line represents a color-coded result of a single  
 1245 locus, covering the entire genome. Correlation sliding window of (B) chromosome II, (C) chromosome III, (D)  
 1246 chromosome V and (E) chromosome X. Windows of 50 SNPs were used to calculate the correlation  
 1247 coefficient and p-value. Black circles represent the correlation coefficient (R value) for each window (scale  
 1248 on the x-axis). Black line indicates the 0 threshold. Grey line represents the  $-\log_{10}$  of the p-values for the  
 1249 corresponding correlation windows (scale on the y-axis). Grey horizontal line is the significance threshold  
 1250 set at  $p$ -value=0.01. Dotted blue lines divide chromosomal region into left, middle and right arms.
